# Supplementary material for: Two new aromatic polyketides from a sponge-derived Fusarium
Source: PubMed Central journal article supplement (PMC6941419; doi:10.3762/bjoc.15.289), 2019-12-09

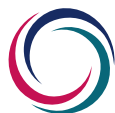

## Supporting Information

for

### **Two new aromatic polyketides from a sponge-derived *Fusarium***

Mada Triandala Sibero, Tao Zhou, Keisuke Fukaya, Daisuke Urabe,  
Ocky K. Karna Radjasa, Agus Sabdono, Agus Trianto and Yasuhiro Igarashi

*Beilstein J. Org. Chem.* **2019**, *15*, 2941–2947. [doi:10.3762/bjoc.15.289](https://doi.org/10.3762/bjoc.15.289)

**Copies of UV, IR, and NMR spectra of compounds 1 and 2**

## Table of contents

- Figure S1.** UV spectrum of karimunone A (**1**)
- Figure S2.** IR spectrum of **1**
- Figure S3.**  $^1\text{H}$  NMR spectrum of **1** (500 MHz,  $\text{DMSO-}d_6$ )
- Figure S4.**  $^{13}\text{C}$  NMR spectrum of **1** (125 MHz,  $\text{DMSO-}d_6$ )
- Figure S5.** HSQC spectrum of **1** (500 MHz,  $\text{DMSO-}d_6$ )
- Figure S6.** HMBC spectrum of **1** (500 MHz,  $\text{DMSO-}d_6$ )
- Figure S7.** UV spectrum of karimunone B (**2**)
- Figure S8.** IR spectrum of **2**
- Figure S9.**  $^1\text{H}$  NMR spectrum of **2** (500 MHz,  $\text{CDCl}_3$ )
- Figure S10.**  $^{13}\text{C}$  NMR spectrum of **2** (125 MHz,  $\text{CDCl}_3$ )
- Figure S11.** HSQC spectrum of **2** (500 MHz,  $\text{CDCl}_3$ )
- Figure S12.** HMBC spectrum of **2** (500 MHz,  $\text{CDCl}_3$ )

**Figure S1.** UV spectrum of karimunone A (1)

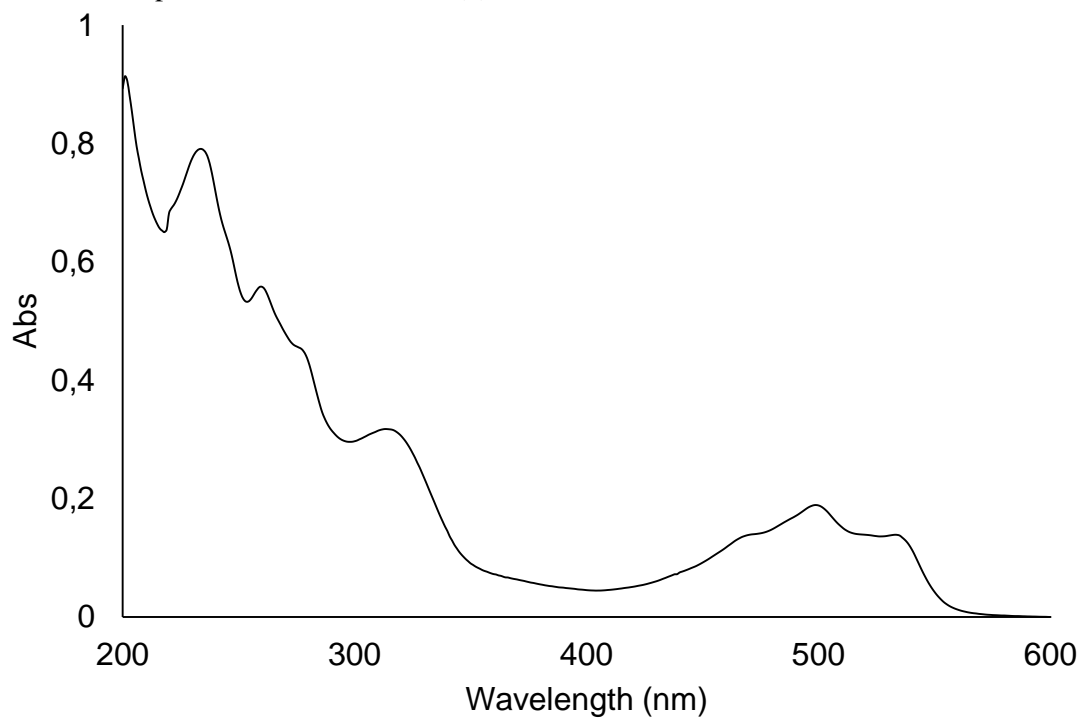

Figure S2. IR spectrum of **1**

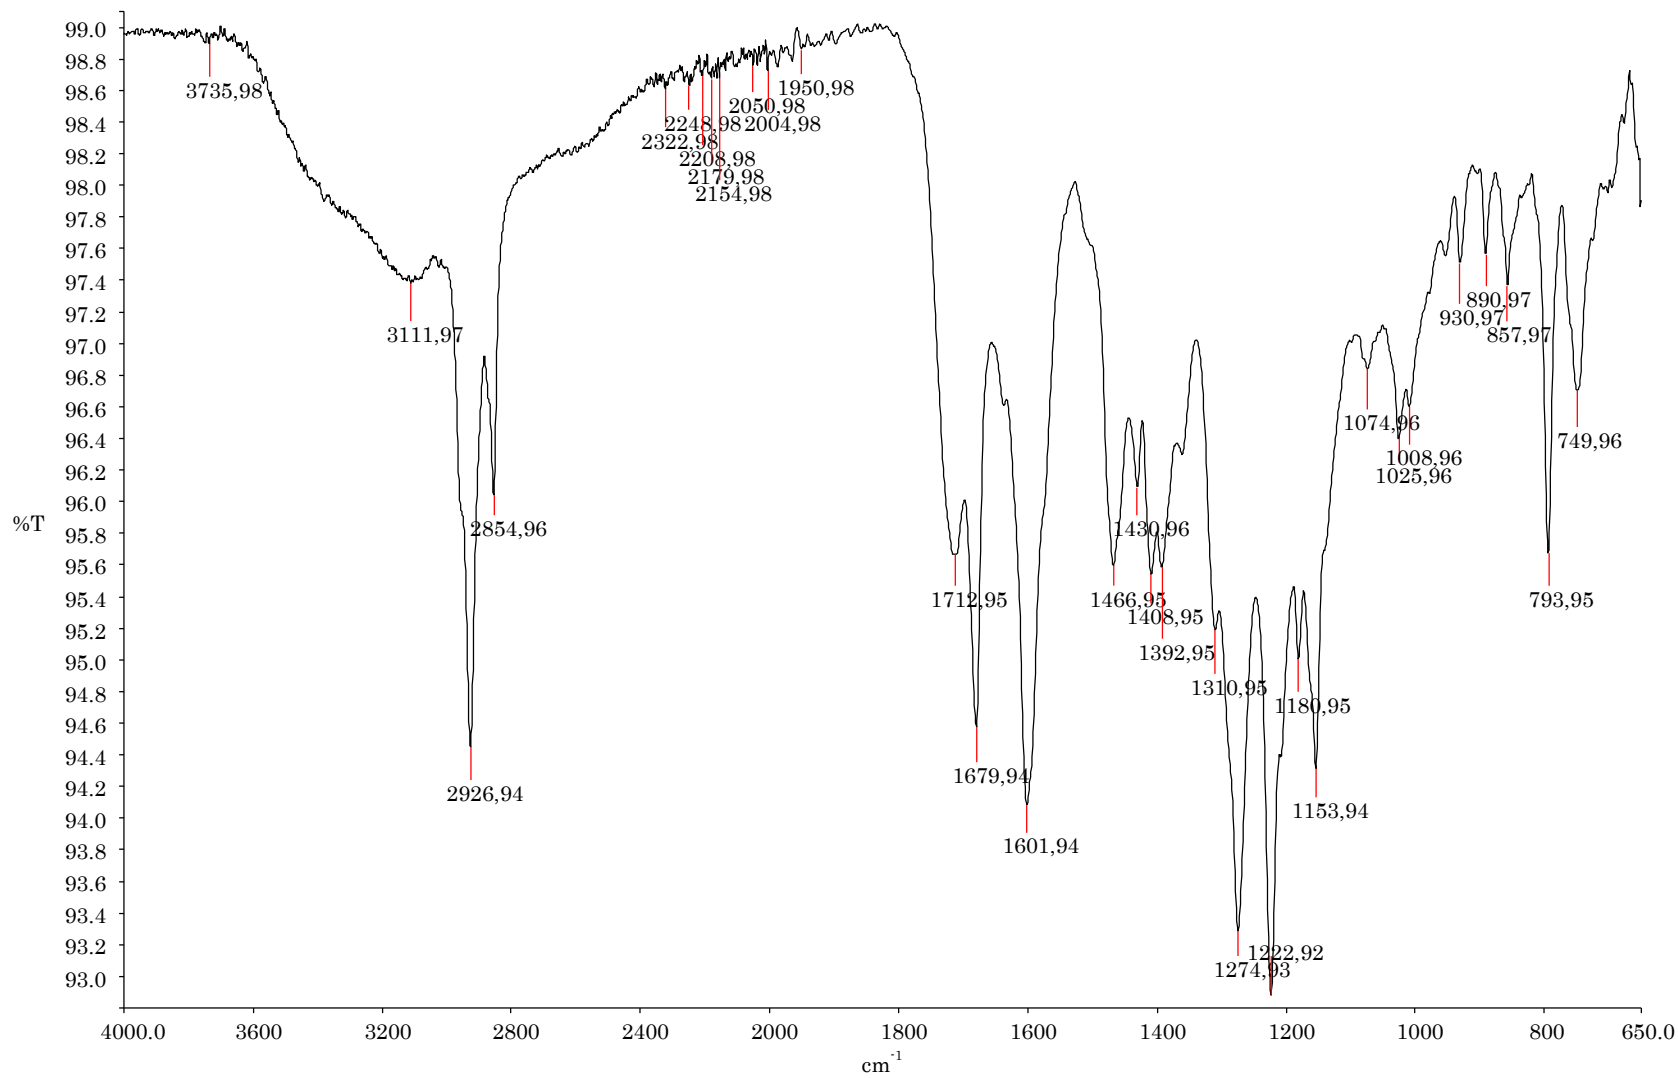

**Figure S3.**  $^1\text{H}$  NMR spectrum of **1** (500 MHz,  $\text{DMSO-}d_6$ )

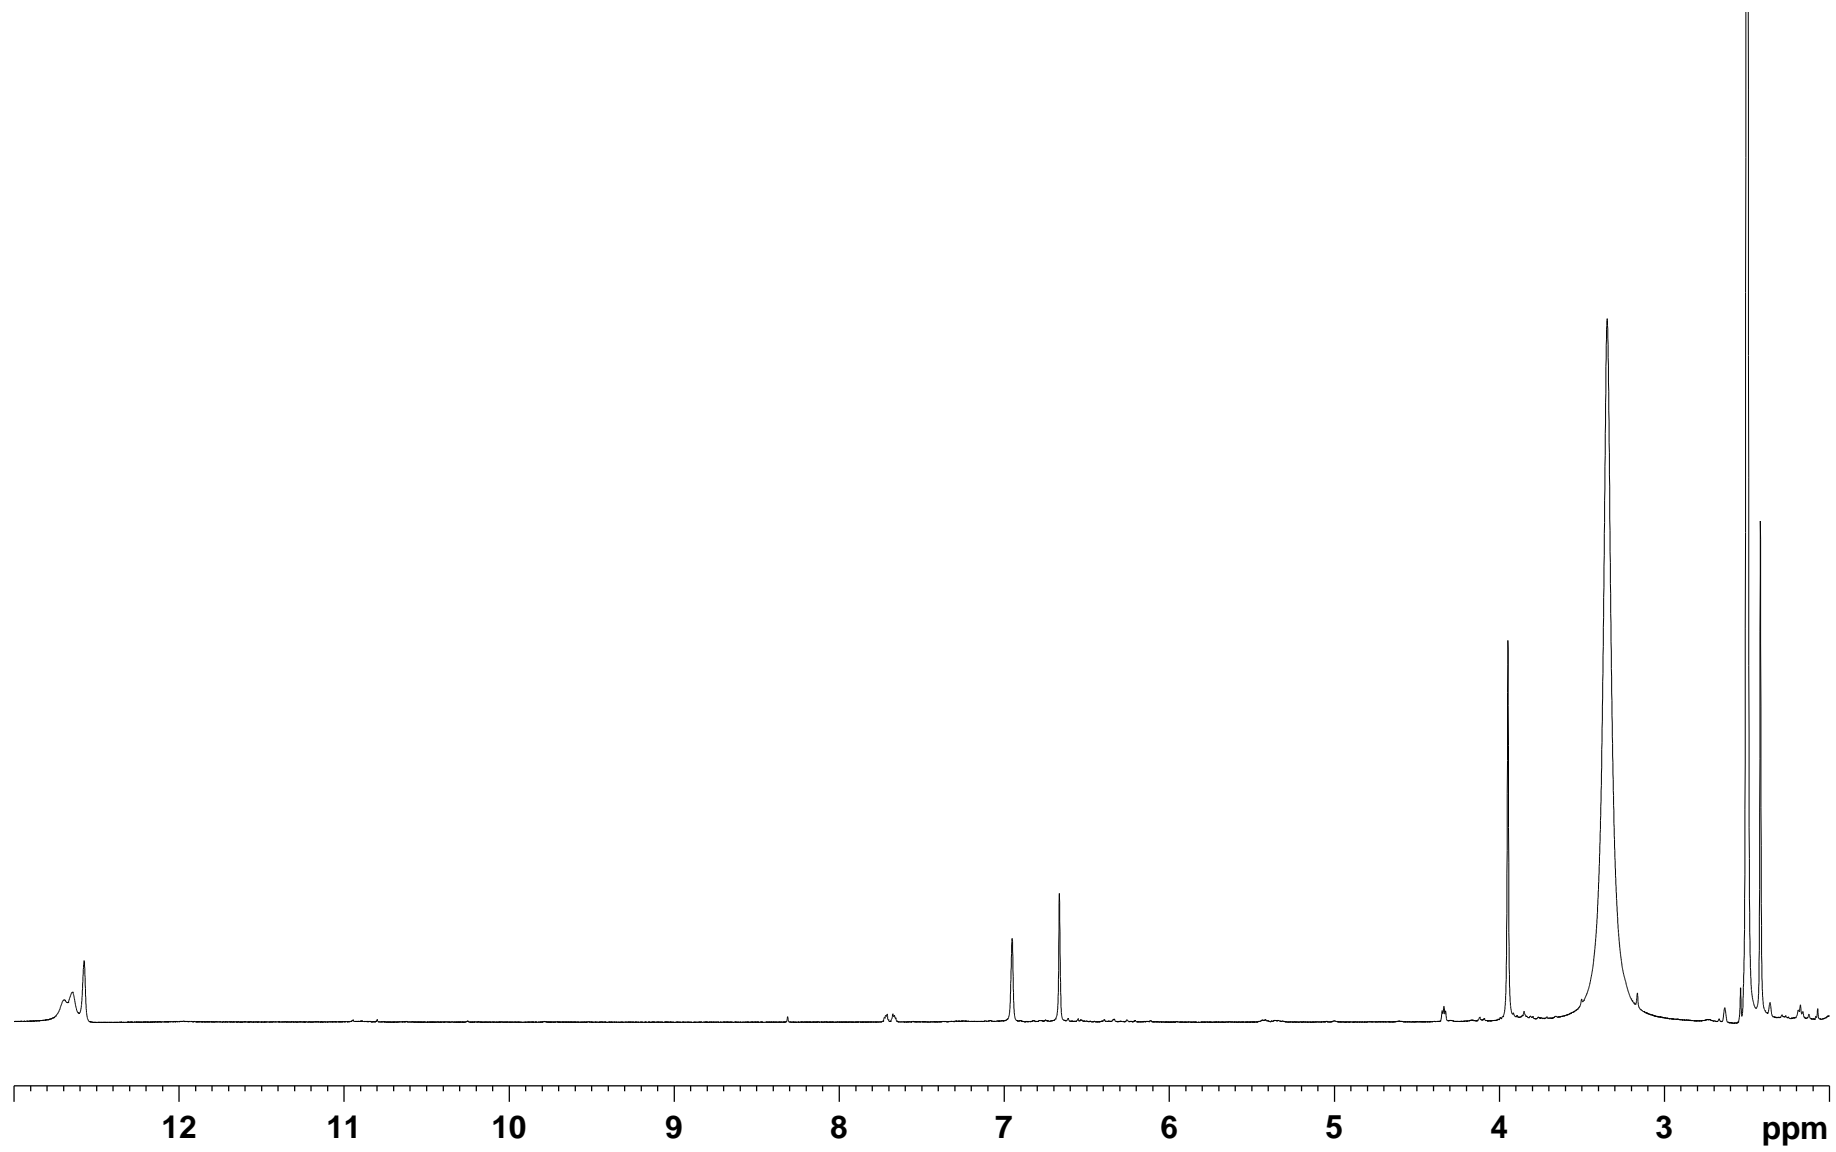

**Figure S4.**  $^{13}\text{C}$  NMR spectrum of **1** (125 MHz,  $\text{DMSO-}d_6$ )

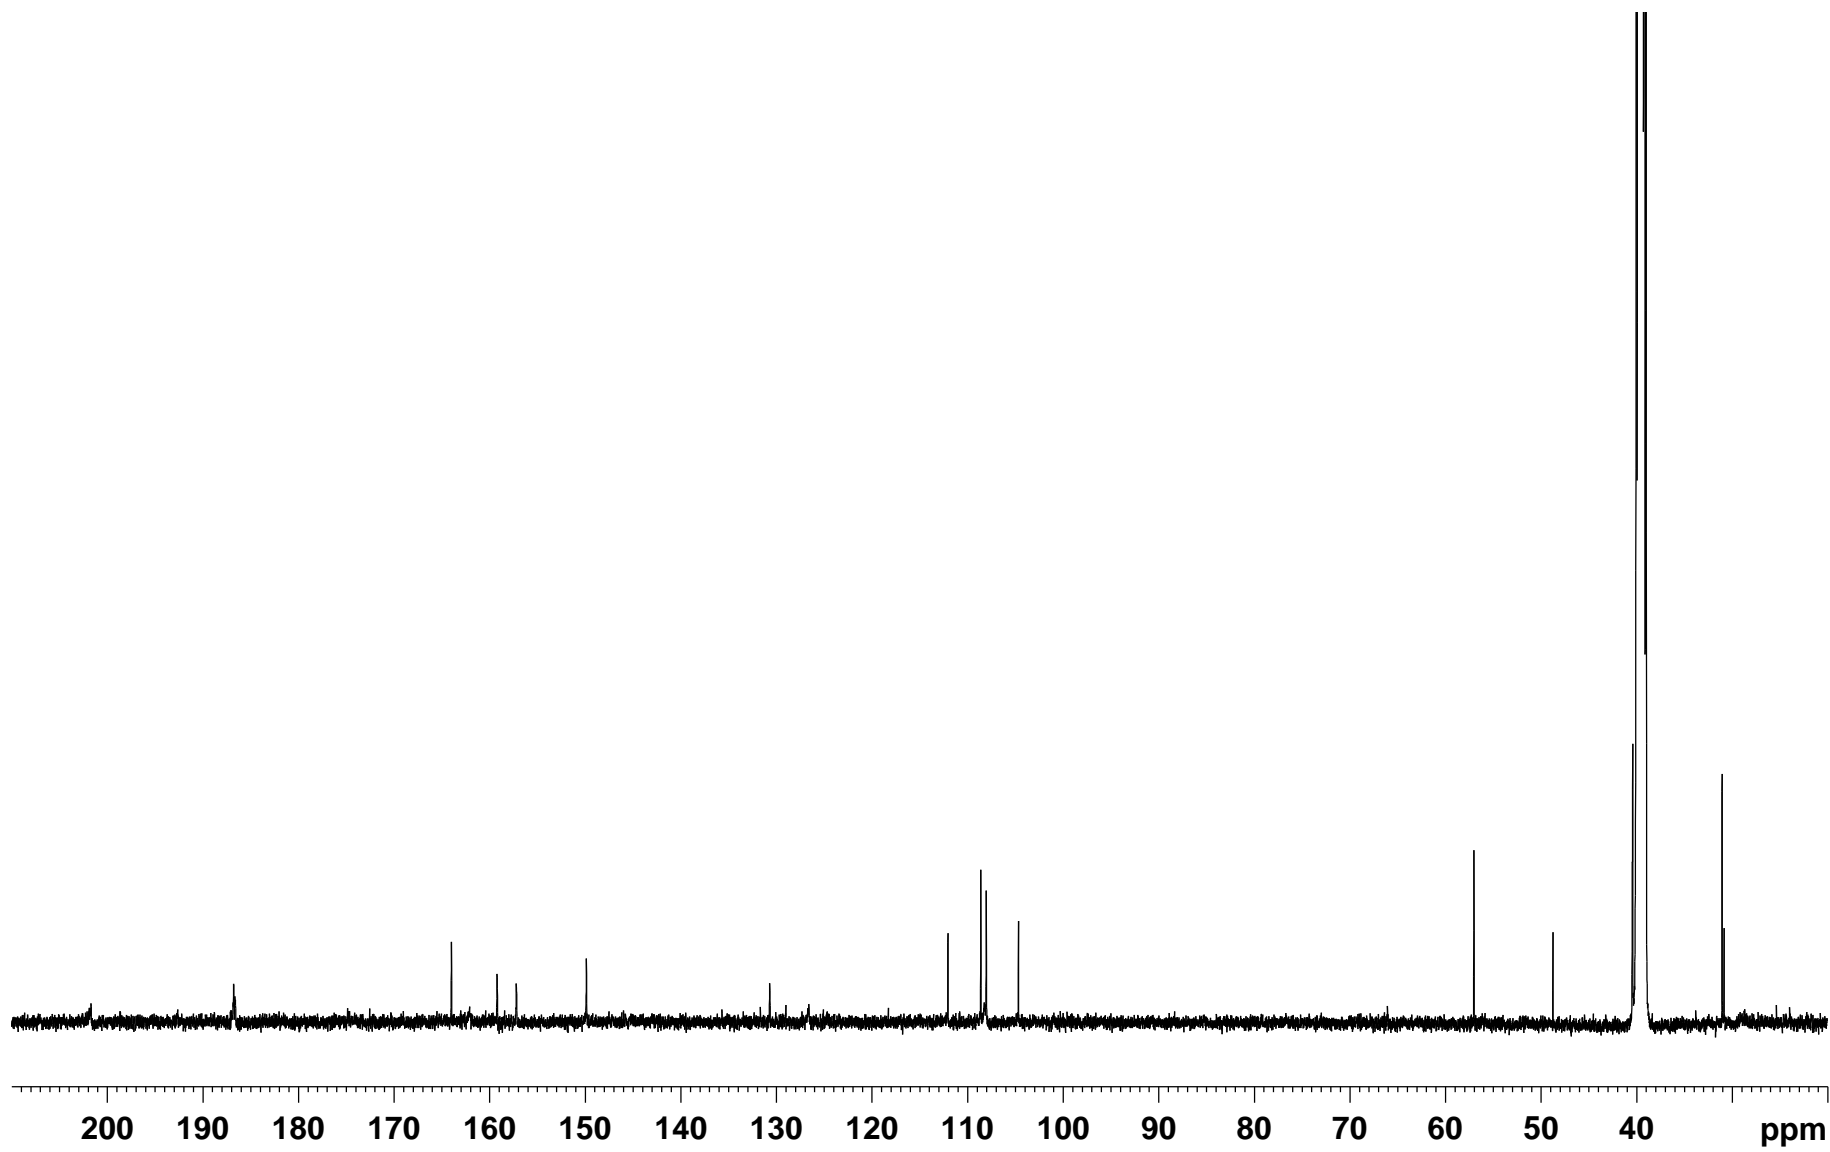

Figure S5. HSQC spectrum of **1** (500 MHz, DMSO-*d*<sub>6</sub>)

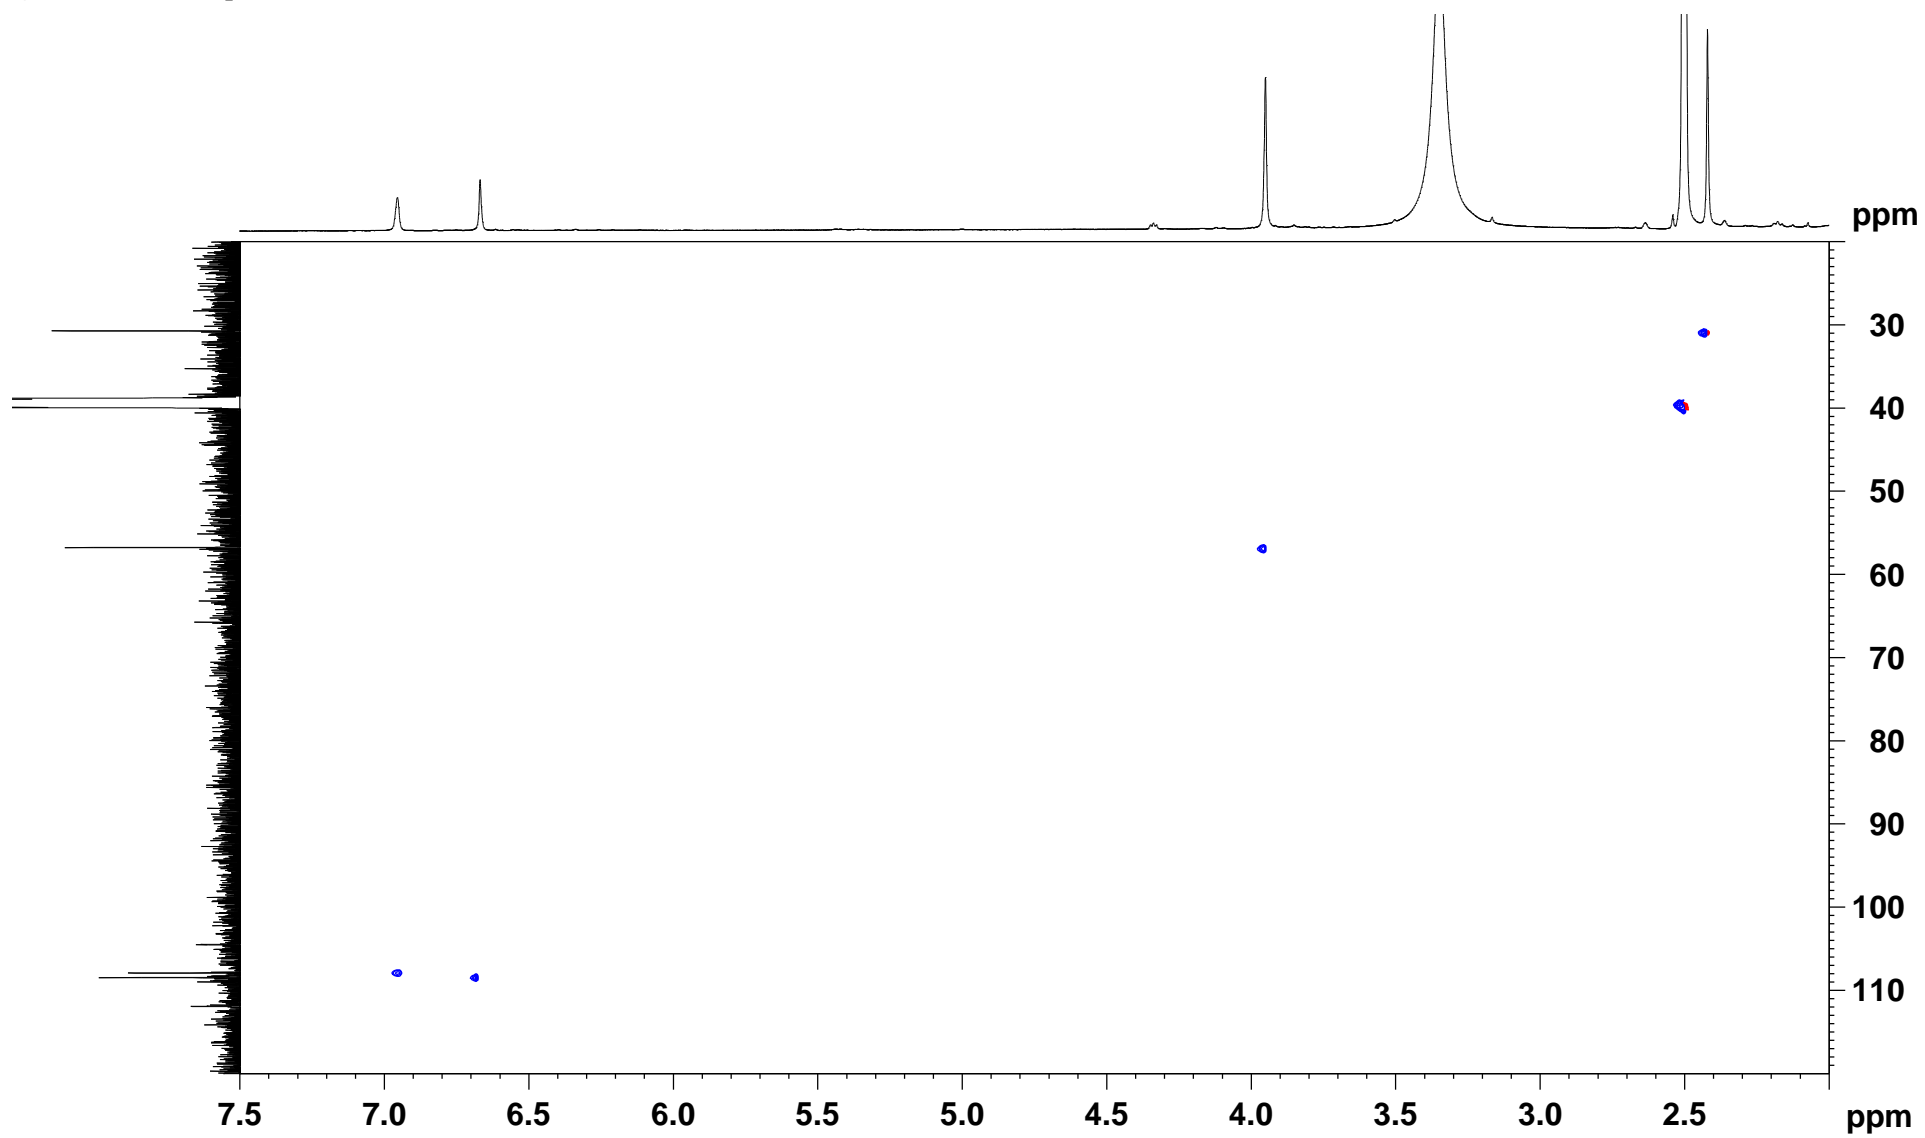

**Figure S6.** HMBC spectrum of **1** (500 MHz, DMSO-*d*<sub>6</sub>)

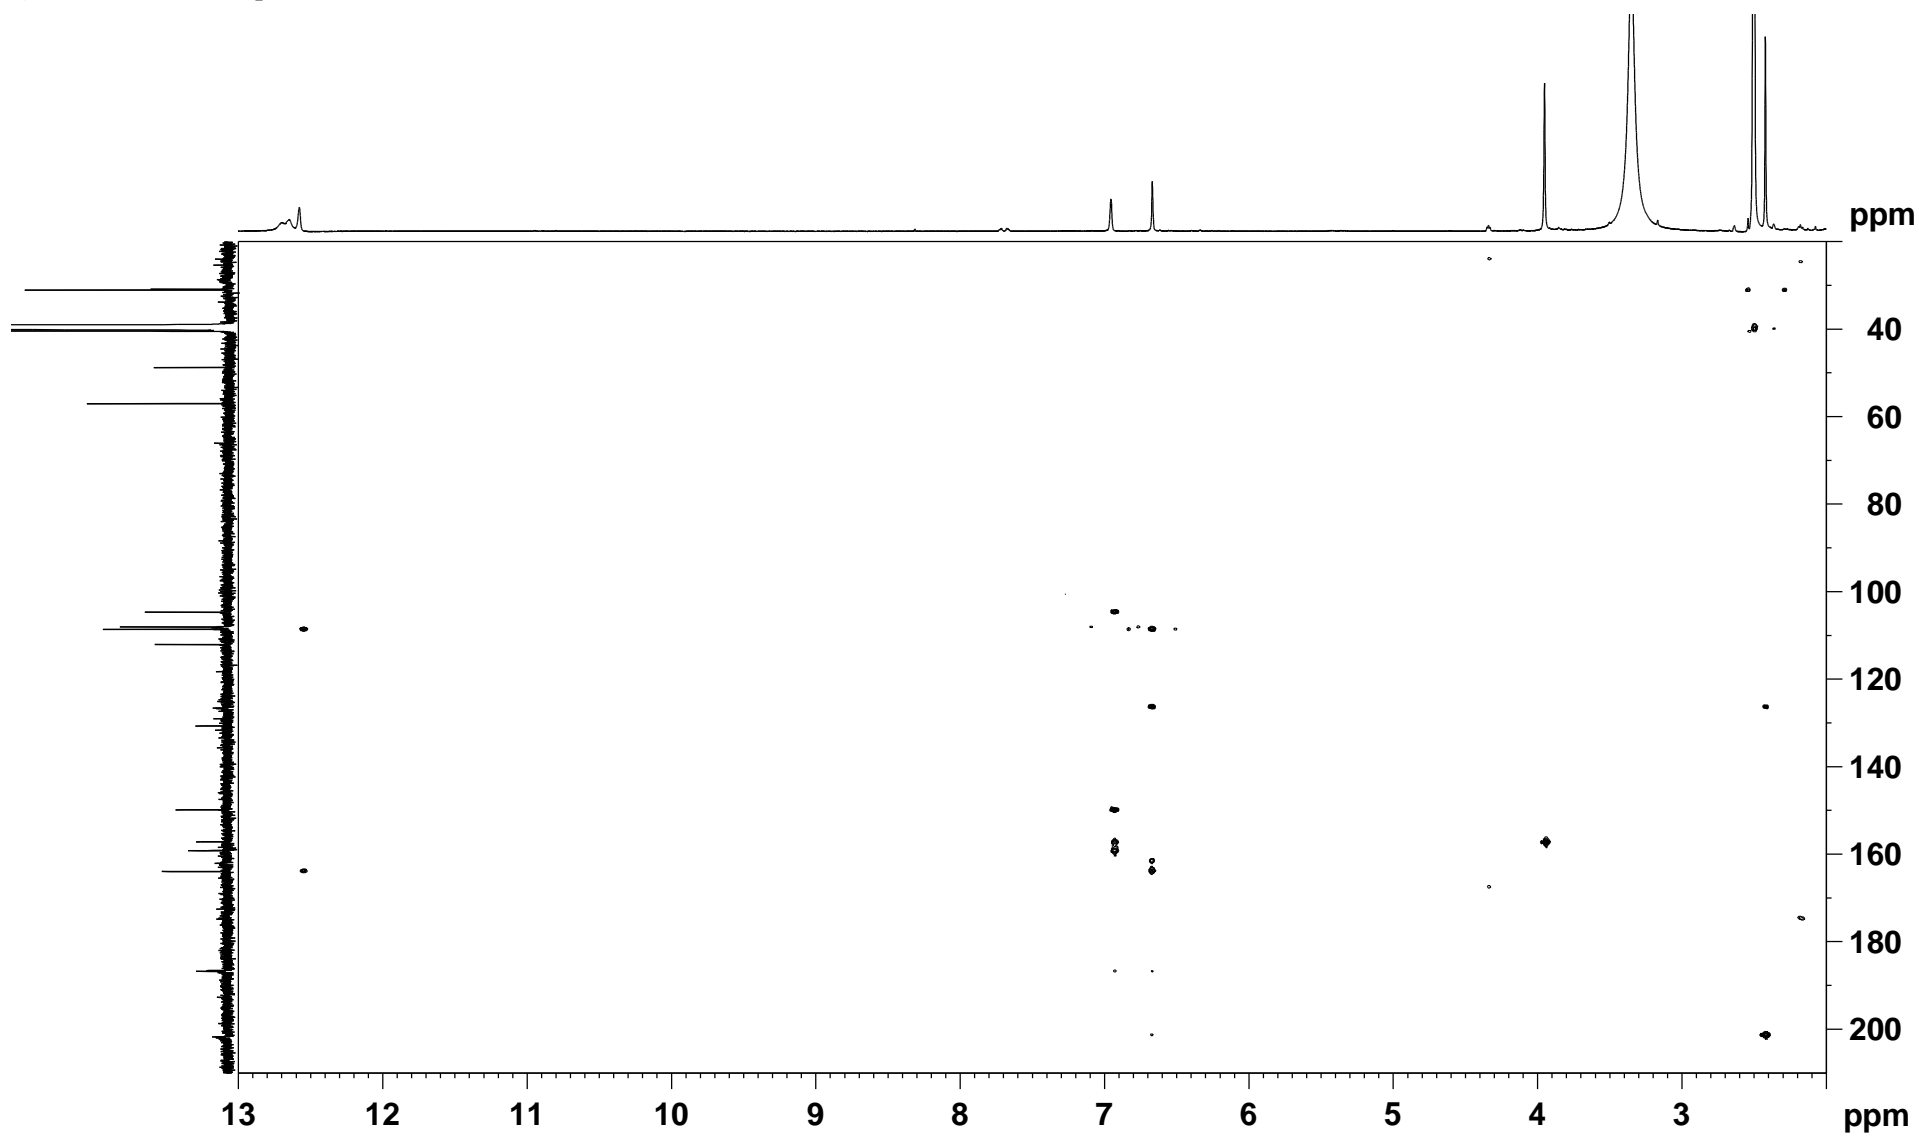



**Figure S7.** UV spectrum of karimunone B (2)

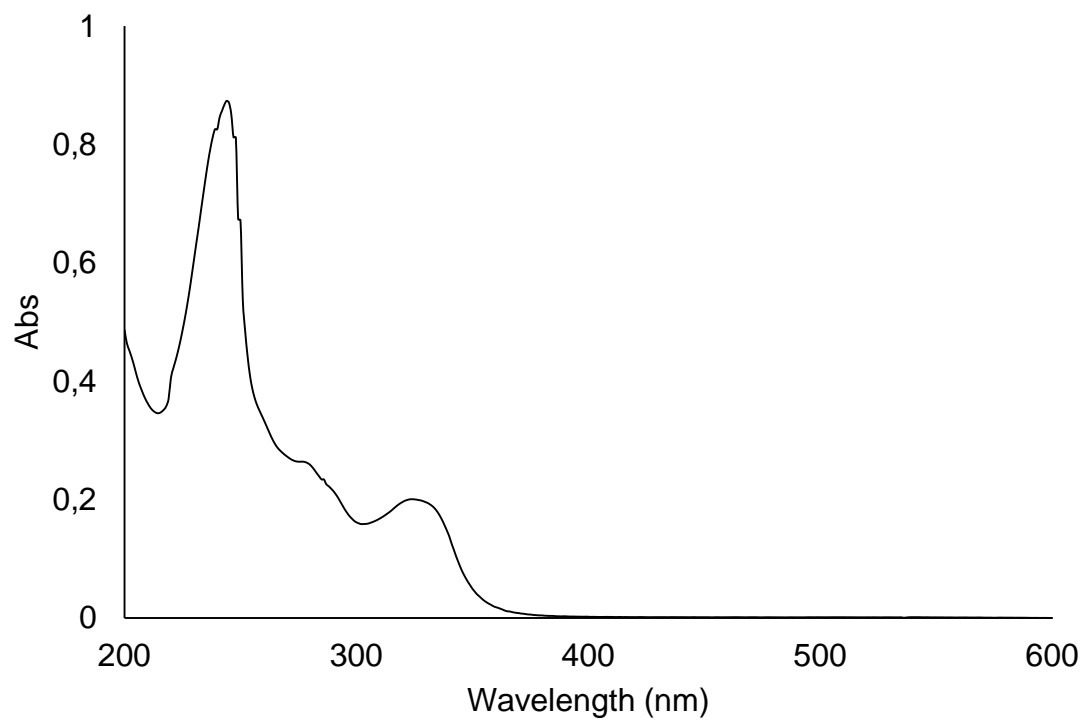

Figure S8. IR spectrum of 2

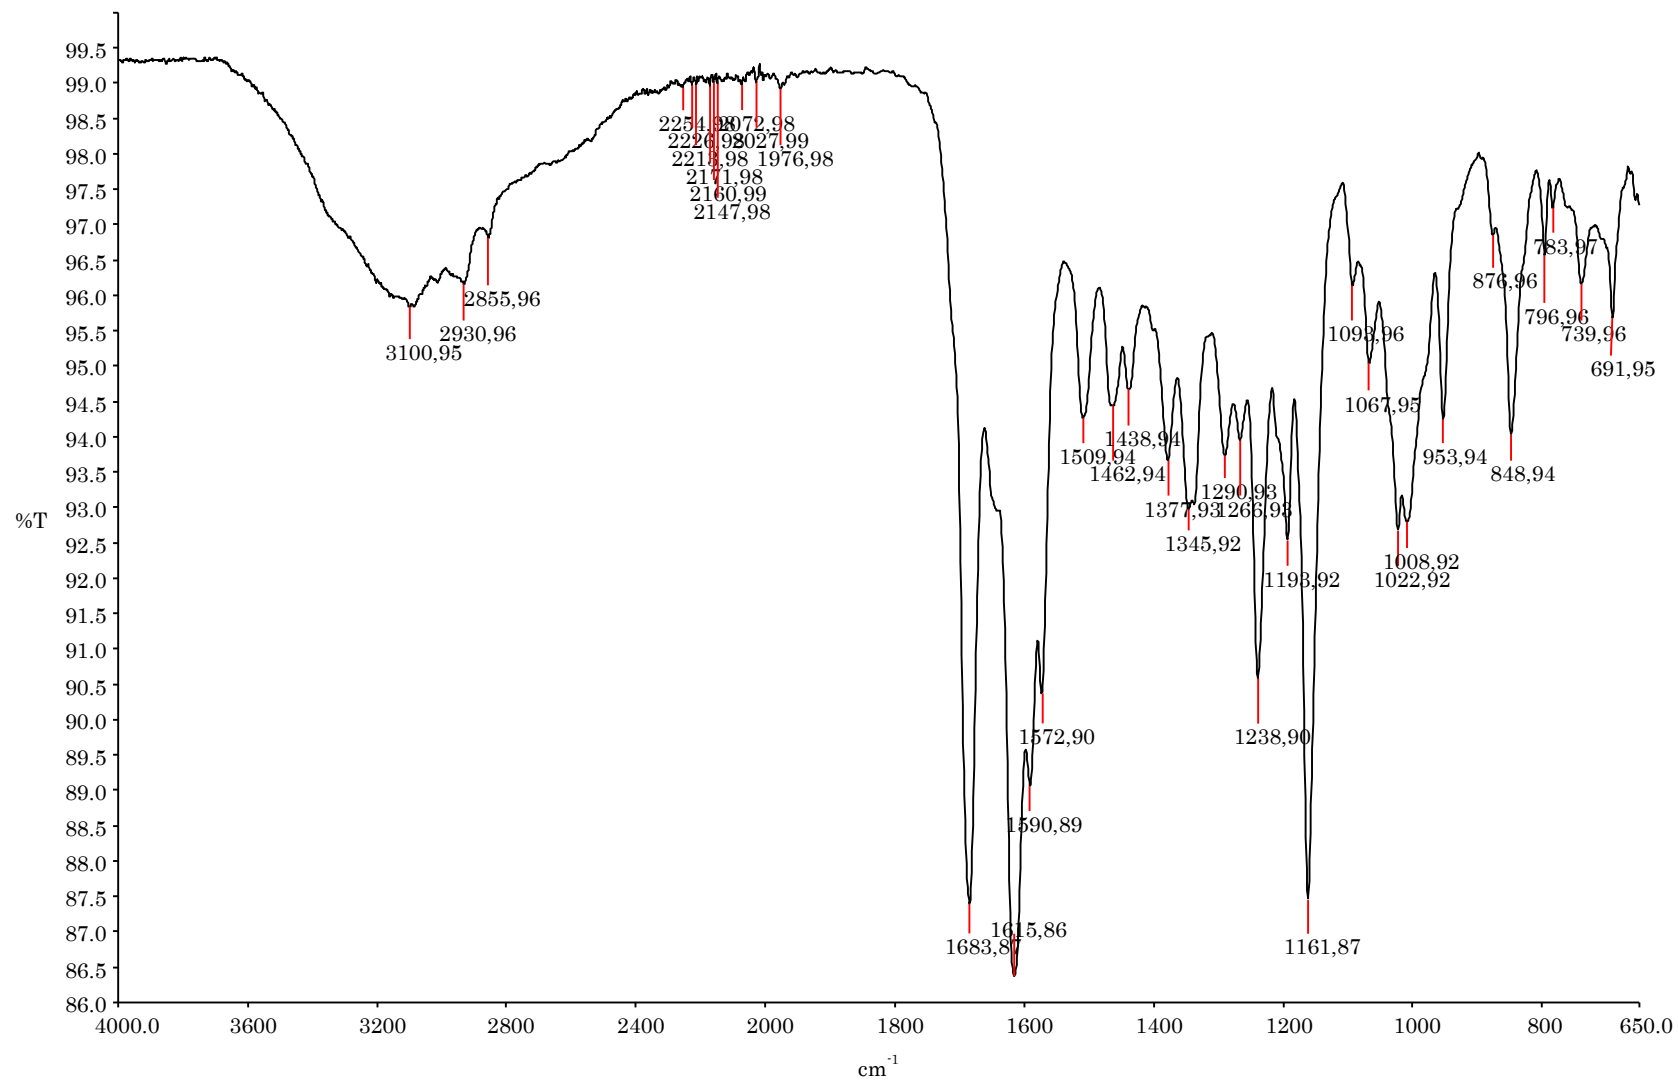

**Figure S9.**  $^1\text{H}$  NMR spectrum of **2** (500 MHz,  $\text{CDCl}_3$ )

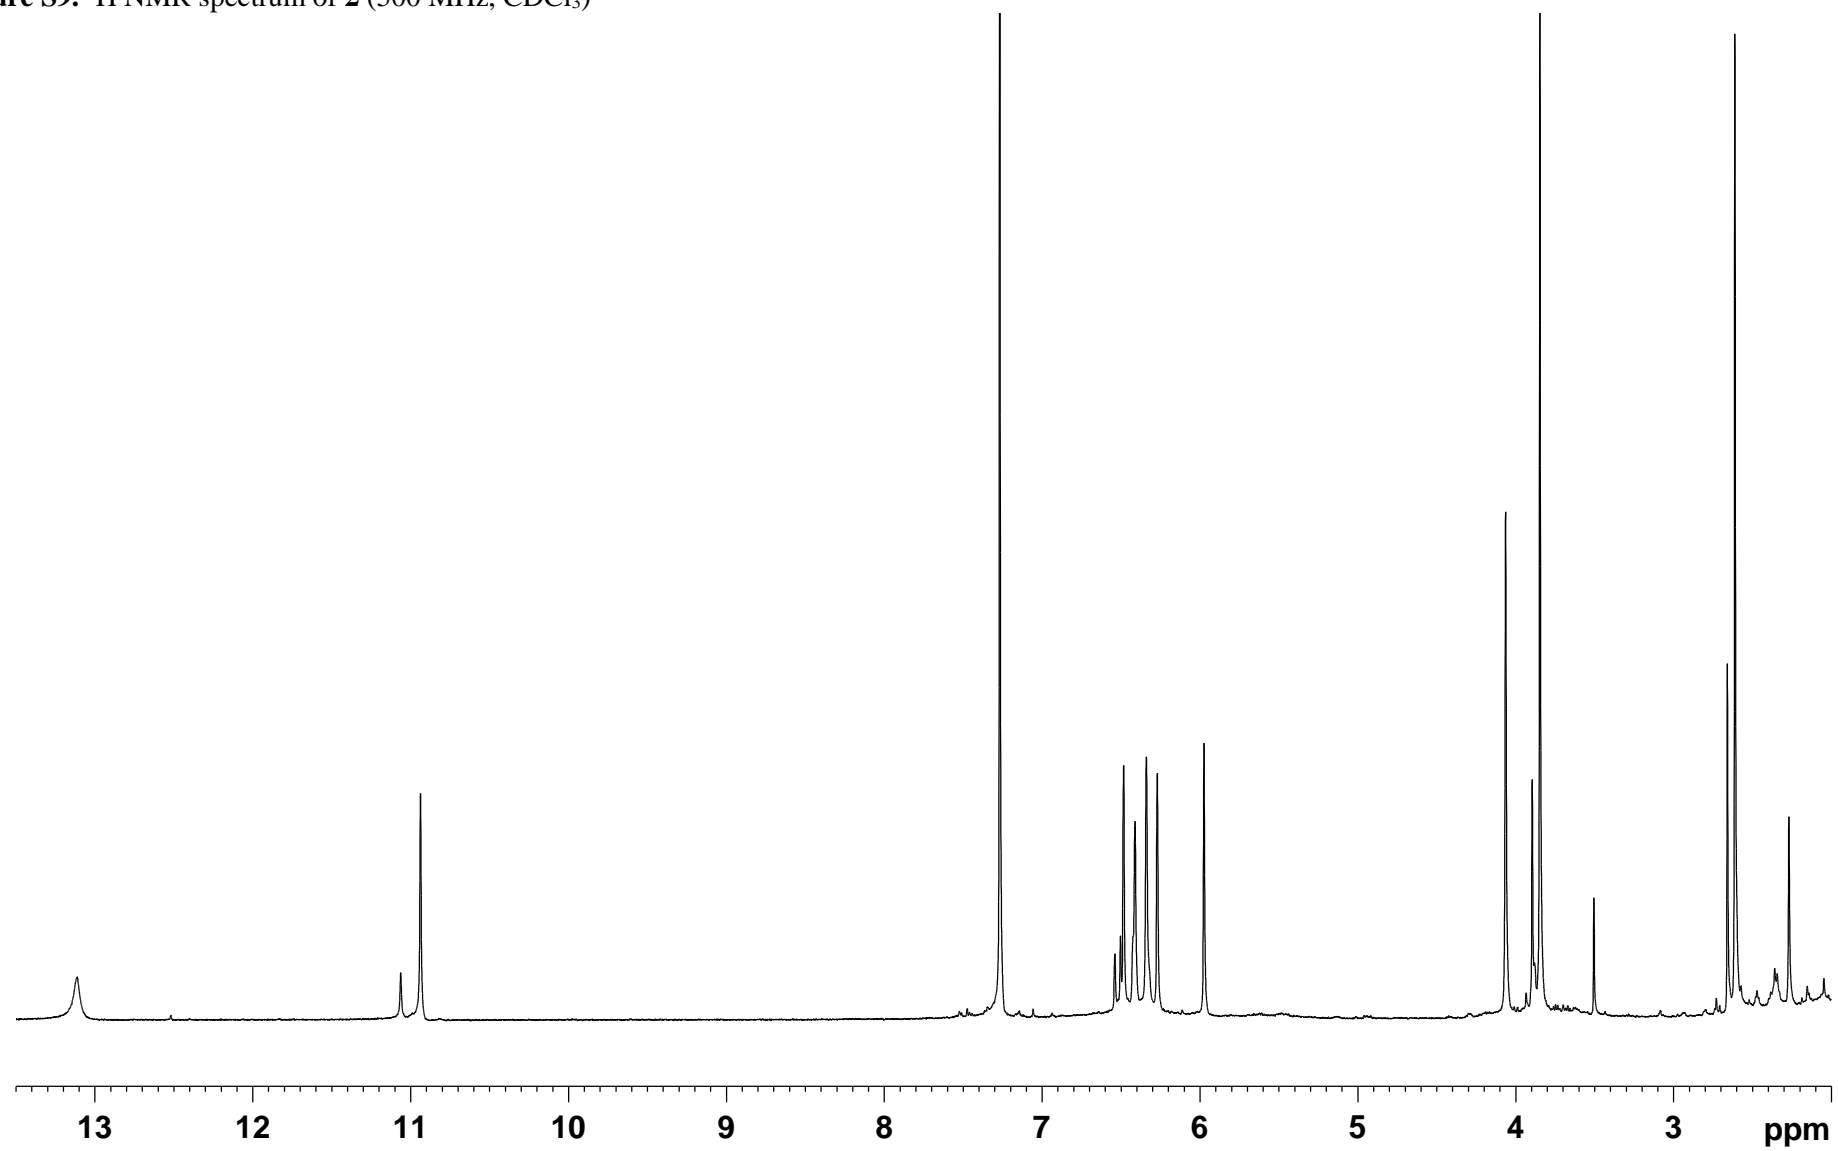

**Figure S10.**  $^{13}\text{C}$  NMR spectrum of **2** (125 MHz,  $\text{CDCl}_3$ )

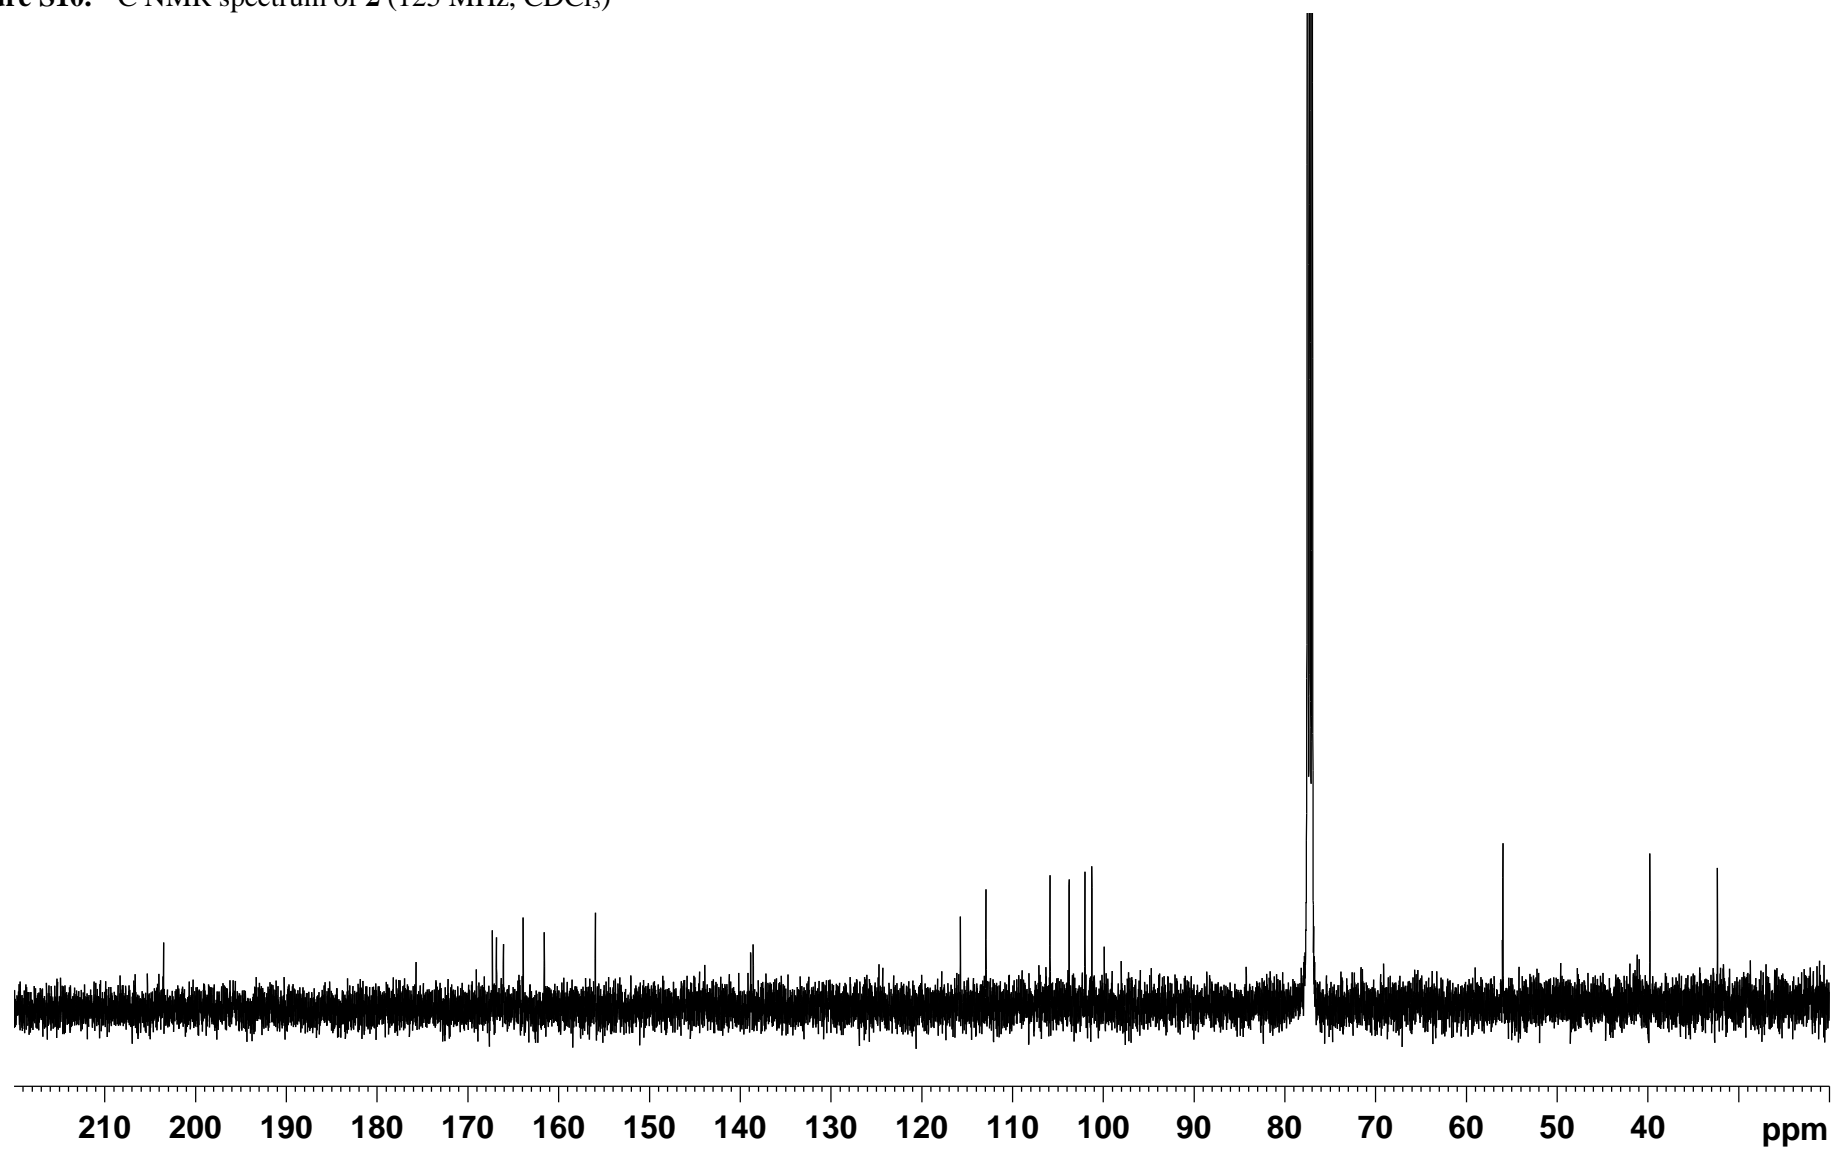

Figure S11. HSQC spectrum of **2** (500 MHz, CDCl<sub>3</sub>)

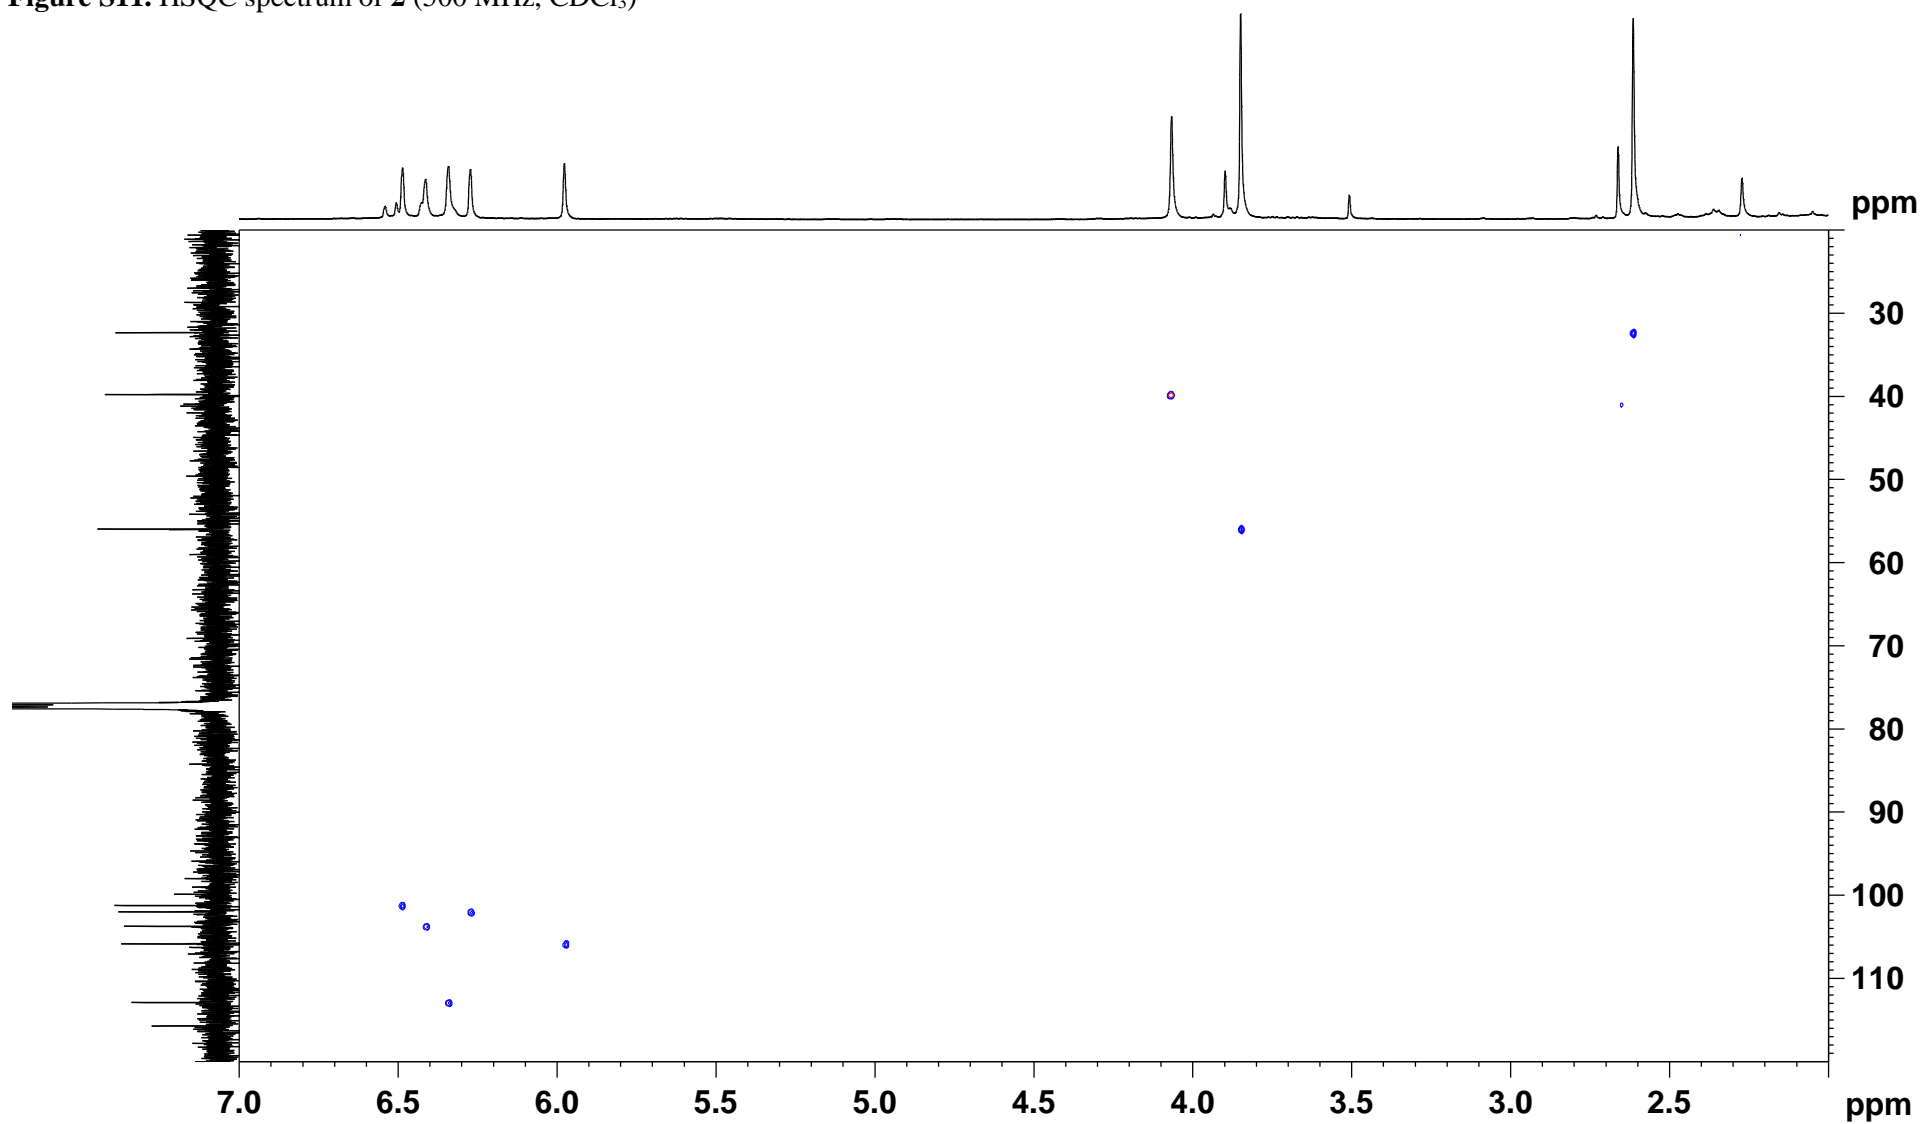

Figure S12. HMBC spectrum of **2** (500 MHz, CDCl<sub>3</sub>)

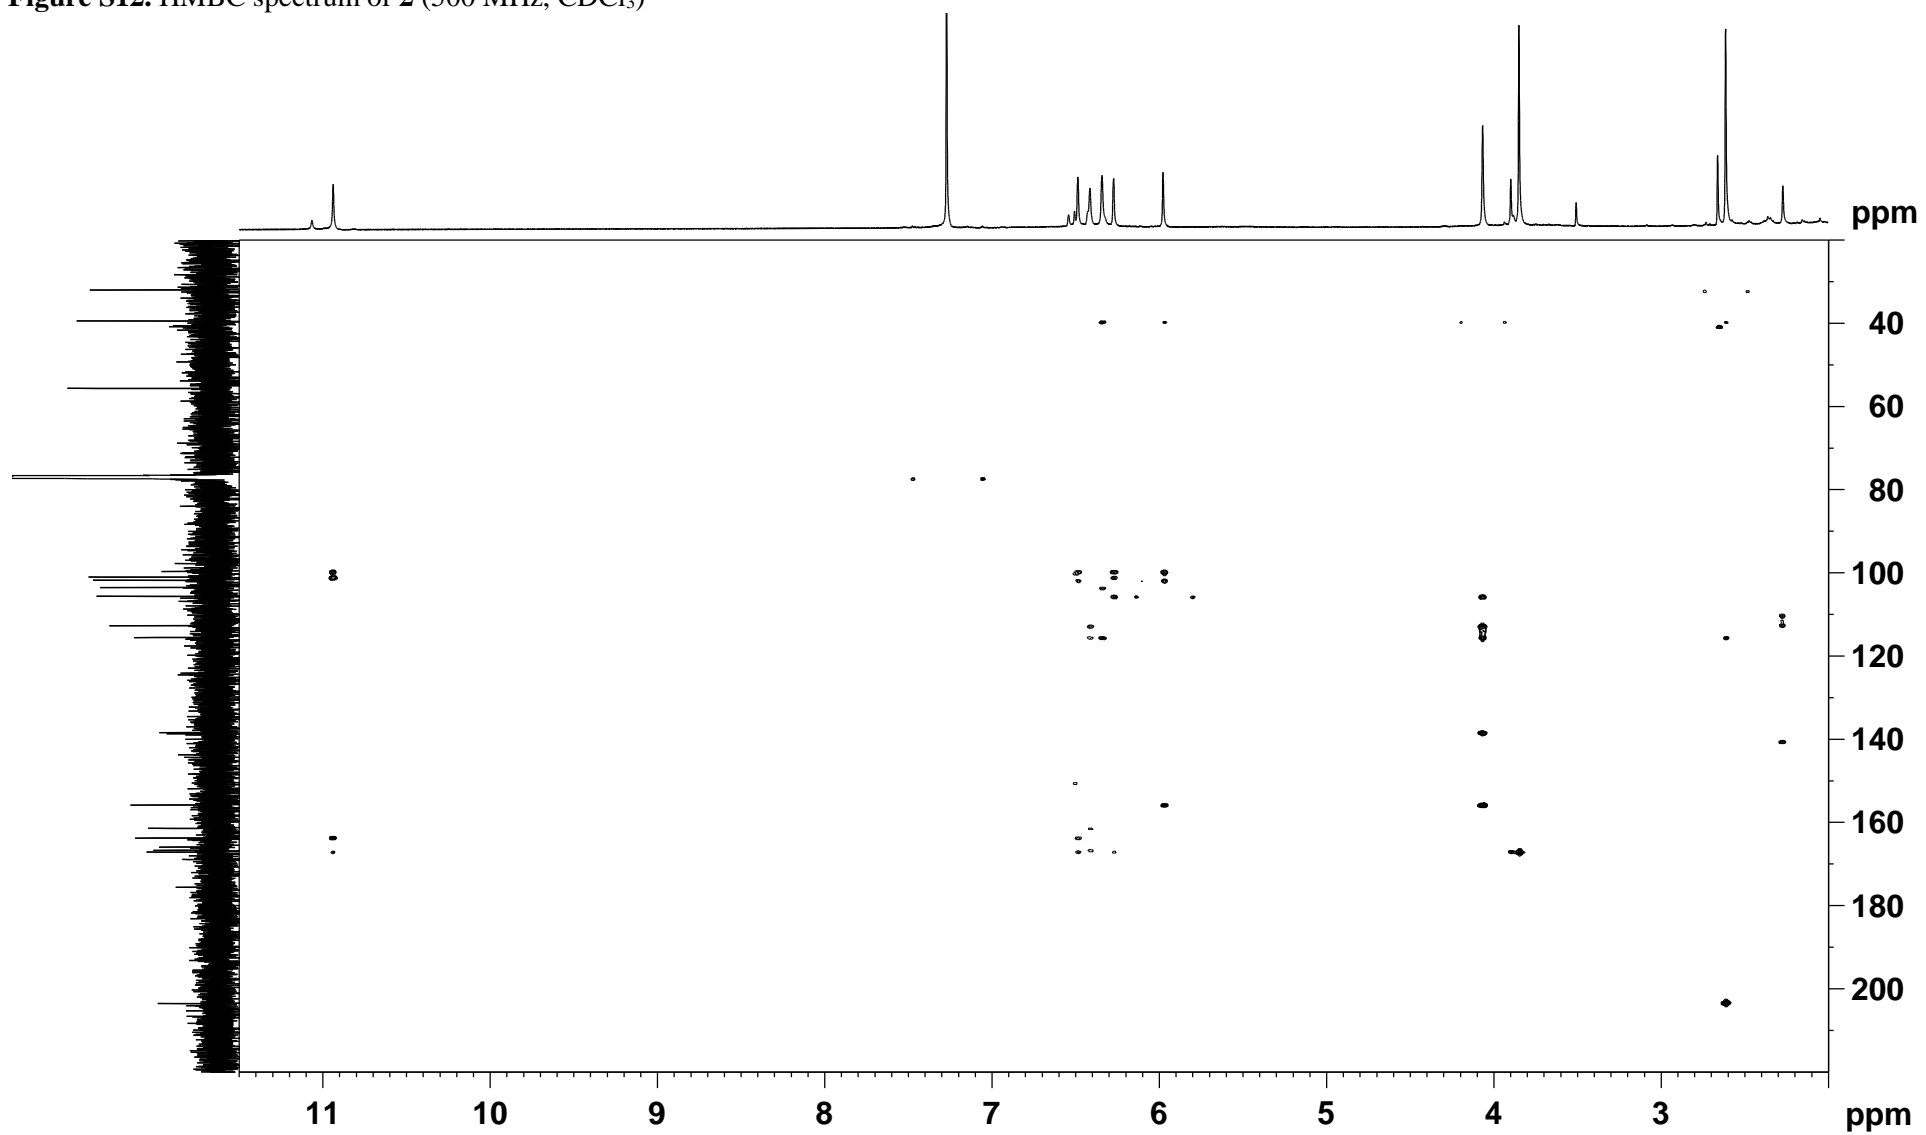

Supplement: Beilstein_J_Org_Chem-15-2941-s001.pdf [file Beilstein_J_Org_Chem-15-2941-s001.pdf]
