# Supplementary material for: Two new aromatic polyketides from a sponge-derived Fusarium
Source: PubMed Central journal article supplement (PMC6941419; doi:10.3762/bjoc.15.289), 2019-12-09
Supplement: Beilstein_J_Org_Chem-15-2941-s002.pdf [file Beilstein_J_Org_Chem-15-2941-s002.pdf]

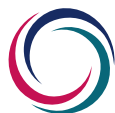

## Supporting Information

for

### **Two new aromatic polyketides from a sponge-derived *Fusarium***

Mada Triandala Sibero, Tao Zhou, Keisuke Fukaya, Daisuke Urabe,  
Ocky K. Karna Radjasa, Agus Sabdono, Agus Trianto and Yasuhiro Igarashi

*Beilstein J. Org. Chem.* **2019**, *15*, 2941–2947. [doi:10.3762/bjoc.15.289](https://doi.org/10.3762/bjoc.15.289)

### **NMR chemical shift calculation for compound 1**

## Table of contents

|                                                                              | page |
|------------------------------------------------------------------------------|------|
| • Cartesian coordinates of the optimized structures of <b>a</b> and <b>b</b> | S2   |
| • Calculated NMR chemical shifts for each conformer of <b>a</b> and <b>b</b> | S10  |

## Cartesian coordinates of the optimized structures of a and b

Structure, energy and Cartesian coordinate of **a-conformer 1**:

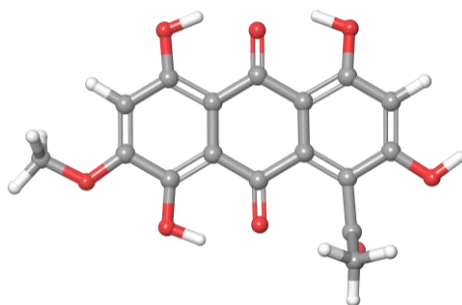

**a-conformer 1** ( $\Delta G = 0.0$  kcal/mol, Boltzmann pop. (298 K) = 69%)

---

M06-2X/6-311+G(d,p)-PCM(DMSO)//M06-2X/6-31G(d)-PCM(DMSO):

*Gibbs Free Energy* (a.u.) = -1256.5372187

---

M06-2X/6-311+G(d,p)-PCM(DMSO): *Electronic energy* (a.u.) = -1256.7588507

---

M06-2X/6-31G(d)-PCM(DMSO): *Zero-point correction* (a.u.) = 0.270808

*Thermal correction to Energy* (a.u.) = 0.291983

*Thermal correction to Enthalpy* (a.u.) = 0.292927

---

*Thermal correction to Gibbs Free Energy* (a.u.) = 0.221632

---

|   |          |          |          |   |          |          |          |
|---|----------|----------|----------|---|----------|----------|----------|
| C | 2.26967  | -1.23710 | 0.01793  | O | -3.15413 | -2.64916 | 1.19964  |
| C | 1.16475  | -0.39446 | 0.01155  | C | -3.02948 | -2.84604 | -1.18566 |
| C | 1.32851  | 1.02632  | -0.00668 | O | 2.21109  | -2.57071 | 0.03157  |
| C | 2.62161  | 1.55869  | -0.01594 | O | 2.88072  | 2.86996  | -0.03450 |
| C | 3.74509  | 0.70255  | -0.00540 | O | 4.57948  | -1.55955 | 0.02182  |
| C | 3.58578  | -0.66363 | 0.01131  | C | 5.91238  | -1.06205 | 0.01738  |
| C | -0.17526 | -0.98307 | 0.02482  | H | 4.72478  | 1.16366  | -0.01178 |
| C | -1.35663 | -0.07778 | 0.03095  | H | -4.44837 | 2.25736  | -0.00561 |
| C | -1.16860 | 1.32330  | -0.00115 | H | -1.27403 | 3.73267  | -0.04828 |
| C | 0.17300  | 1.90527  | -0.01759 | H | -5.65613 | 0.28343  | 0.03290  |
| C | -2.62284 | -0.64088 | 0.06044  | H | -2.17281 | -2.61841 | -1.82399 |
| C | -3.74052 | 0.22032  | 0.04692  | H | -3.11031 | -3.92166 | -1.02191 |
| C | -3.58783 | 1.59600  | 0.00791  | H | -3.93299 | -2.48470 | -1.69103 |
| C | -2.30812 | 2.15901  | -0.01033 | H | 1.25645  | -2.81778 | 0.03247  |
| O | 0.31846  | 3.15309  | -0.04043 | H | 2.01300  | 3.34022  | -0.04179 |
| O | -0.34834 | -2.20715 | 0.02782  | H | 6.55649  | -1.93902 | 0.02830  |
| O | -2.23175 | 3.49162  | -0.03950 | H | 6.10138  | -0.47229 | -0.88485 |
| O | -4.94790 | -0.37979 | 0.06057  | H | 6.09947  | -0.45136 | 0.90597  |
| C | -2.91452 | -2.12956 | 0.13250  |   |          |          |          |

Structure, energy and Cartesian coordinate of **a-conformer 2**:

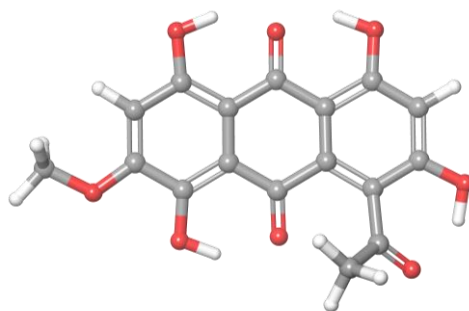

**a-conformer 2** ( $\Delta G = 0.5$  kcal/mol, Boltzmann pop. (298 K) = 31%)

---

M06-2X/6-311+G(d,p)-PCM(DMSO)//M06-2X/6-31G(d)-PCM(DMSO):

*Gibbs Free Energy* (a.u.) = -1256.5364662

---

M06-2X/6-311+G(d,p)-PCM(DMSO): *Electronic energy* (a.u.) = -1256.7598442

---

M06-2X/6-31G(d)-PCM(DMSO): *Zero-point correction* (a.u.) = 0.271800

*Thermal correction to Energy* (a.u.) = 0.292435

*Thermal correction to Enthalpy* (a.u.) = 0.293379

*Thermal correction to Gibbs Free Energy* (a.u.) = 0.223378

---

|   |          |          |          |   |          |          |          |
|---|----------|----------|----------|---|----------|----------|----------|
| C | -2.26776 | -1.21192 | -0.18932 | O | 3.85990  | -2.66259 | -0.32205 |
| C | -1.15757 | -0.37982 | -0.12579 | C | 2.20543  | -2.84128 | 1.35735  |
| C | -1.30945 | 1.03267  | 0.02696  | O | -2.22046 | -2.53458 | -0.36363 |
| C | -2.59636 | 1.56872  | 0.13521  | O | -2.84354 | 2.87552  | 0.26484  |
| C | -3.72518 | 0.71997  | 0.10710  | O | -4.57701 | -1.52609 | -0.09939 |
| C | -3.57740 | -0.63884 | -0.05018 | C | -5.90423 | -1.02801 | 0.02404  |
| C | 0.17786  | -0.96535 | -0.24599 | H | -4.69998 | 1.18177  | 0.20128  |
| C | 1.36890  | -0.08828 | -0.04666 | H | 4.48265  | 2.20658  | -0.19412 |
| C | 1.19178  | 1.30549  | -0.03743 | H | 1.31624  | 3.71318  | 0.05771  |
| C | -0.14697 | 1.89921  | 0.03603  | H | 4.96312  | -1.25195 | -0.42939 |
| C | 2.63904  | -0.67255 | -0.02986 | H | 1.38484  | -2.27421 | 1.79283  |
| C | 3.76519  | 0.18561  | -0.15795 | H | 1.84104  | -3.80479 | 0.99653  |
| C | 3.60963  | 1.56725  | -0.13308 | H | 2.95765  | -3.02997 | 2.13018  |
| C | 2.34478  | 2.13729  | -0.04039 | H | -1.27414 | -2.77684 | -0.49142 |
| O | -0.27676 | 3.14473  | 0.12321  | H | -1.97495 | 3.34277  | 0.25334  |
| O | 0.34200  | -2.15381 | -0.53852 | H | -6.55459 | -1.89815 | -0.03805 |
| O | 2.27114  | 3.46806  | 0.00012  | H | -6.04087 | -0.52864 | 0.98813  |
| O | 5.01208  | -0.28400 | -0.27506 | H | -6.13244 | -0.33339 | -0.79011 |
| C | 2.91444  | -2.11754 | 0.23779  |   |          |          |          |

Structure, energy and Cartesian coordinate of **a-conformer 3**:

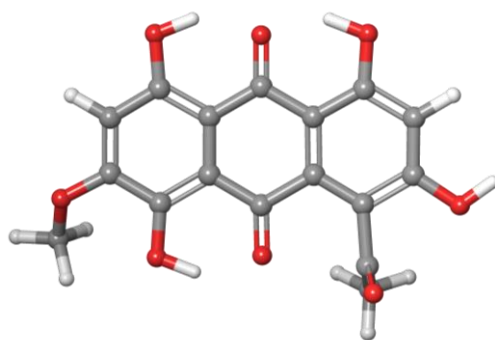

**a-conformer 3** ( $\Delta G = 3.3$  kcal/mol, Boltzmann pop. (298 K) = 0.3%)

---

M06-2X/6-311+G(d,p)-PCM(DMSO)//M06-2X/6-31G(d)-PCM(DMSO):

*Gibbs Free Energy* (a.u.) = -1256.5319414

---

M06-2X/6-311+G(d,p)-PCM(DMSO): *Electronic energy* (a.u.) = -1256.7519884

---

M06-2X/6-31G(d)-PCM(DMSO): *Zero-point correction* (a.u.) = 0.269972

*Thermal correction to Energy* (a.u.) = 0.291470

*Thermal correction to Enthalpy* (a.u.) = 0.292414

*Thermal correction to Gibbs Free Energy* (a.u.) = 0.220047

---

|   |          |          |          |   |          |          |          |
|---|----------|----------|----------|---|----------|----------|----------|
| C | -2.40509 | -0.99559 | 0.15732  | O | 2.96097  | -2.74633 | 1.23515  |
| C | -1.24150 | -0.22816 | 0.09695  | C | 2.71922  | -3.00709 | -1.13500 |
| C | -1.30558 | 1.19619  | 0.05067  | O | -2.42165 | -2.32980 | 0.25260  |
| C | -2.55726 | 1.82331  | 0.06810  | O | -2.72631 | 3.15014  | 0.03199  |
| C | -3.72799 | 1.04043  | 0.10805  | O | -4.83218 | -1.01587 | 0.22553  |
| C | -3.67133 | -0.33274 | 0.14036  | C | -5.03130 | -2.13868 | -0.64462 |
| C | 0.05684  | -0.90735 | 0.11032  | H | -4.69392 | 1.53283  | 0.10361  |
| C | 1.29904  | -0.09006 | 0.04806  | H | 4.54439  | 2.01722  | -0.16179 |
| C | 1.20973  | 1.31932  | -0.02016 | H | 1.48561  | 3.71569  | -0.13686 |
| C | -0.08659 | 1.99274  | -0.01178 | H | 5.61109  | -0.04309 | -0.11424 |
| C | 2.52188  | -0.74120 | 0.05293  | H | 2.73306  | -4.08009 | -0.93817 |
| C | 3.69710  | 0.03731  | -0.02642 | H | 1.85338  | -2.74010 | -1.74513 |
| C | 3.64105  | 1.41874  | -0.10014 | H | 3.62261  | -2.72591 | -1.68914 |
| C | 2.40413  | 2.07113  | -0.09124 | H | -1.48377 | -2.63643 | 0.24229  |
| O | -0.14795 | 3.24458  | -0.05797 | H | -1.83130 | 3.56066  | -0.00978 |
| O | 0.14526  | -2.13896 | 0.16345  | H | -6.10442 | -2.17869 | -0.83211 |
| O | 2.42184  | 3.40415  | -0.15590 | H | -4.49983 | -1.99442 | -1.58885 |
| O | 4.85676  | -0.64933 | -0.03880 | H | -4.69577 | -3.06033 | -0.17038 |
| C | 2.71180  | -2.24429 | 0.16195  |   |          |          |          |

Structure, energy and Cartesian coordinate of **a-conformer 4**:

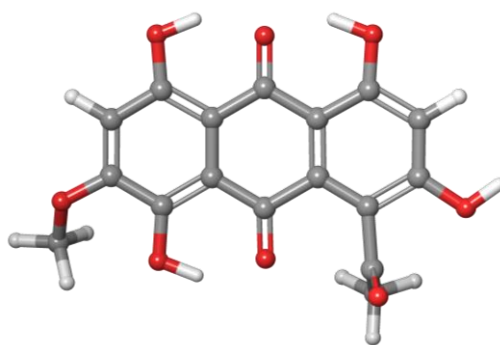

**a-conformer 4** ( $\Delta G = 3.4$  kcal/mol, Boltzmann pop. (298 K) = 0.2%)

---

M06-2X/6-311+G(d,p)-PCM(DMSO)//M06-2X/6-31G(d)-PCM(DMSO):

*Gibbs Free Energy* (a.u.) = -1256.5318302

---

M06-2X/6-311+G(d,p)-PCM(DMSO): *Electronic energy* (a.u.) = -1256.7520482

---

M06-2X/6-31G(d)-PCM(DMSO): *Zero-point correction* (a.u.) = 0.270120

*Thermal correction to Energy* (a.u.) = 0.291571

*Thermal correction to Enthalpy* (a.u.) = 0.292515

*Thermal correction to Gibbs Free Energy* (a.u.) = 0.220218

---

|   |          |          |          |   |          |          |          |
|---|----------|----------|----------|---|----------|----------|----------|
| C | 2.40496  | -1.00108 | -0.12361 | O | -2.86031 | -2.81836 | 1.15719  |
| C | 1.24222  | -0.23174 | -0.07265 | C | -2.82829 | -2.92822 | -1.23725 |
| C | 1.30720  | 1.19327  | -0.06289 | O | 2.42016  | -2.33700 | -0.19112 |
| C | 2.55907  | 1.81897  | -0.10375 | O | 2.72880  | 3.14620  | -0.10505 |
| C | 3.72925  | 1.03462  | -0.12737 | O | 4.83169  | -1.02487 | -0.19738 |
| C | 3.67167  | -0.33890 | -0.12545 | C | 5.03142  | -2.12722 | 0.69846  |
| C | -0.05642 | -0.91029 | -0.05738 | H | 4.69545  | 1.52637  | -0.13918 |
| C | -1.29686 | -0.09135 | 0.01726  | H | -4.54150 | 2.02306  | 0.15397  |
| C | -1.20750 | 1.31963  | 0.02330  | H | -1.48278 | 3.71874  | 0.05051  |
| C | 0.08879  | 1.99195  | -0.01843 | H | -5.60959 | -0.03785 | 0.15991  |
| C | -2.51880 | -0.74214 | 0.06749  | H | -2.83489 | -4.01156 | -1.10852 |
| C | -3.69374 | 0.03900  | 0.11677  | H | -3.77156 | -2.60872 | -1.69587 |
| C | -3.63821 | 1.42243  | 0.11794  | H | -2.01304 | -2.62543 | -1.89831 |
| C | -2.40140 | 2.07379  | 0.07634  | H | 1.48187  | -2.64228 | -0.17646 |
| O | 0.15059  | 3.24463  | -0.01641 | H | 1.83401  | 3.55815  | -0.07366 |
| O | -0.14668 | -2.14199 | -0.10398 | H | 6.10462  | -2.16280 | 0.88645  |
| O | -2.41891 | 3.40838  | 0.08614  | H | 4.50025  | -1.96138 | 1.63928  |
| O | -4.85366 | -0.64667 | 0.14871  | H | 4.69581  | -3.05956 | 0.24568  |
| C | -2.70540 | -2.24929 | 0.09979  |   |          |          |          |

Structure, energy and Cartesian coordinate of **b-conformer 1**:

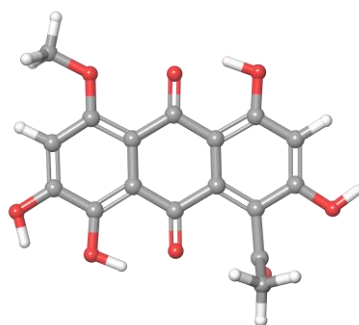

**b-conformer 1** ( $\Delta G = 0.0$  kcal/mol, Boltzmann pop. (298 K) = 73%)

---

M06-2X/6-311+G(d,p)-PCM(DMSO)//M06-2X/6-31G(d)-PCM(DMSO):

*Gibbs Free Energy* (a.u.) = -1256.5263727

---

M06-2X/6-311+G(d,p)-PCM(DMSO): *Electronic energy* (a.u.) = -1256.7470117

---

M06-2X/6-31G(d)-PCM(DMSO): *Zero-point correction* (a.u.) = 0.270485

*Thermal correction to Energy* (a.u.) = 0.291933

*Thermal correction to Enthalpy* (a.u.) = 0.292878

*Thermal correction to Gibbs Free Energy* (a.u.) = 0.220639

---

|   |          |          |          |   |          |          |          |
|---|----------|----------|----------|---|----------|----------|----------|
| C | 1.95909  | -1.90465 | 0.01726  | O | -3.61776 | -2.10702 | 1.20148  |
| C | 1.08681  | -0.82104 | 0.01005  | C | -3.54564 | -2.31784 | -1.18447 |
| C | 1.58085  | 0.51734  | -0.00385 | O | 1.61006  | -3.20355 | 0.02732  |
| C | 2.97419  | 0.72039  | -0.00402 | O | 3.44499  | 1.97797  | -0.01259 |
| C | 3.84747  | -0.38530 | 0.00635  | O | 4.19601  | -2.71783 | 0.02432  |
| C | 3.35466  | -1.67077 | 0.01589  | C | 4.85110  | 2.18198  | -0.00784 |
| C | -0.35607 | -1.10582 | 0.02188  | H | 4.92208  | -0.25898 | 0.00638  |
| C | -1.31405 | 0.02456  | 0.03188  | H | -3.81873 | 2.96911  | -0.00572 |
| C | -0.81972 | 1.34369  | -0.00261 | H | -0.39601 | 3.69885  | -0.05896 |
| C | 0.62751  | 1.63918  | -0.02268 | H | -5.43524 | 1.30376  | 0.03380  |
| C | -2.67352 | -0.25463 | 0.06368  | H | -3.85936 | -3.35019 | -1.02289 |
| C | -3.57665 | 0.82623  | 0.04969  | H | -4.34772 | -1.76684 | -1.68970 |
| C | -3.12467 | 2.13451  | 0.00843  | H | -2.65953 | -2.28154 | -1.82234 |
| C | -1.75238 | 2.40587  | -0.01292 | H | 0.62509  | -3.24746 | 0.02545  |
| O | 1.00316  | 2.81912  | -0.05538 | H | 3.66630  | -3.53551 | 0.03130  |
| O | -0.78078 | -2.26546 | 0.02110  | H | 5.31607  | 1.74882  | -0.89886 |
| O | -1.38823 | 3.68986  | -0.04595 | H | 4.98743  | 3.26206  | -0.01410 |
| O | -4.88754 | 0.50309  | 0.06392  | H | 5.30838  | 1.76007  | 0.89250  |
| C | -3.27698 | -1.64565 | 0.13486  |   |          |          |          |

Structure, energy and Cartesian coordinate of **b-conformer 2**:

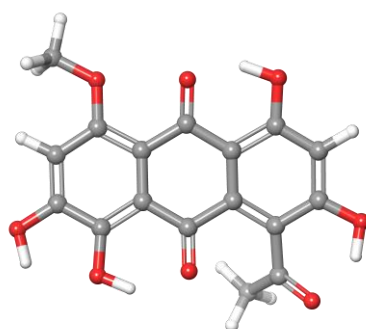

**b-conformer 2** ( $\Delta G = 0.6$  kcal/mol, Boltzmann pop. (298 K) = 25%)

---

M06-2X/6-311+G(d,p)-PCM(DMSO)//M06-2X/6-31G(d)-PCM(DMSO):

*Gibbs Free Energy* (a.u.) = -1256.5260183

---

M06-2X/6-311+G(d,p)-PCM(DMSO): *Electronic energy* (a.u.) = -1256.7485673

---

M06-2X/6-31G(d)-PCM(DMSO): *Zero-point correction* (a.u.) = 0.271350

*Thermal correction to Energy* (a.u.) = 0.292228

*Thermal correction to Enthalpy* (a.u.) = 0.293172

*Thermal correction to Gibbs Free Energy* (a.u.) = 0.222549

---

|   |          |          |          |   |          |          |          |
|---|----------|----------|----------|---|----------|----------|----------|
| C | 1.97033  | -1.86739 | -0.23145 | O | -4.32845 | -1.98041 | -0.16559 |
| C | 1.08653  | -0.79573 | -0.18291 | C | -2.62632 | -2.51863 | 1.38120  |
| C | 1.55951  | 0.53947  | -0.03332 | O | 1.64051  | -3.16091 | -0.40052 |
| C | 2.94393  | 0.75312  | 0.10590  | O | 3.39102  | 2.00981  | 0.25519  |
| C | 3.82865  | -0.34326 | 0.09146  | O | 4.20987  | -2.66257 | -0.10345 |
| C | 3.35634  | -1.62616 | -0.07737 | C | 4.78730  | 2.22432  | 0.41112  |
| C | -0.35030 | -1.08476 | -0.29771 | H | 4.89713  | -0.21103 | 0.19959  |
| C | -1.32710 | 0.01048  | -0.06061 | H | -3.88763 | 2.89978  | -0.18082 |
| C | -0.85479 | 1.32765  | -0.09026 | H | -0.46385 | 3.69077  | -0.08578 |
| C | 0.59199  | 1.64595  | -0.06677 | H | -5.09889 | -0.38228 | -0.28990 |
| C | -2.69222 | -0.29901 | 0.00424  | H | -2.45945 | -3.52173 | 0.98429  |
| C | -3.61558 | 0.77370  | -0.10795 | H | -1.69575 | -2.12104 | 1.78228  |
| C | -3.16833 | 2.09067  | -0.12754 | H | -3.36058 | -2.59148 | 2.18957  |
| C | -1.80928 | 2.38337  | -0.09001 | H | 0.67029  | -3.20499 | -0.56118 |
| O | 0.94786  | 2.83127  | -0.05967 | H | 3.69616  | -3.47905 | -0.24018 |
| O | -0.75490 | -2.20635 | -0.61157 | H | 4.90504  | 3.30108  | 0.51973  |
| O | -1.45563 | 3.66840  | -0.09566 | H | 5.16596  | 1.72164  | 1.30639  |
| O | -4.93804 | 0.57901  | -0.16964 | H | 5.33933  | 1.88217  | -0.46964 |
| C | -3.24825 | -1.64876 | 0.31415  |   |          |          |          |



Structure, energy and Cartesian coordinate of **b-conformer 3**:

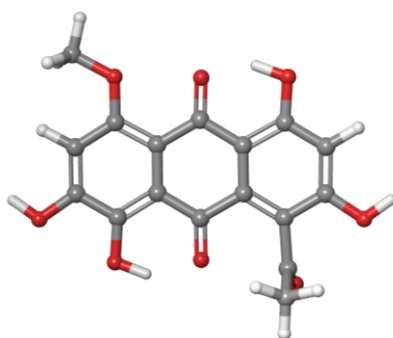

**b-conformer 3** ( $\Delta G = 2.5$  kcal/mol, Boltzmann pop. (298 K) = 1.1%)

---

M06-2X/6-311+G(d,p)-PCM(DMSO)//M06-2X/6-31G(d)-PCM(DMSO):

*Gibbs Free Energy* (a.u.) = -1256.5230671

---

M06-2X/6-311+G(d,p)-PCM(DMSO): *Electronic energy* (a.u.) = -1256.7430241

---

M06-2X/6-31G(d)-PCM(DMSO): *Zero-point correction* (a.u.) = 0.270121

*Thermal correction to Energy* (a.u.) = 0.291688

*Thermal correction to Enthalpy* (a.u.) = 0.292633

*Thermal correction to Gibbs Free Energy* (a.u.) = 0.219957

---

|   |          |          |          |   |          |          |          |
|---|----------|----------|----------|---|----------|----------|----------|
| C | 1.95682  | -1.92304 | 0.01673  | O | -3.62395 | -2.10780 | 1.20168  |
| C | 1.08582  | -0.83198 | 0.00866  | C | -3.54961 | -2.31969 | -1.18388 |
| C | 1.57479  | 0.51056  | -0.00519 | O | 1.58605  | -3.20873 | 0.02623  |
| C | 2.96415  | 0.71830  | -0.00400 | O | 3.43636  | 1.97550  | -0.01208 |
| C | 3.83743  | -0.38880 | 0.00742  | O | 4.13844  | -2.77204 | 0.02692  |
| C | 3.35520  | -1.67878 | 0.01687  | C | 4.84191  | 2.18201  | -0.00454 |
| C | -0.35789 | -1.10995 | 0.02015  | H | 4.91086  | -0.24170 | 0.00808  |
| C | -1.31554 | 0.02208  | 0.03110  | H | -3.82208 | 2.96655  | -0.00383 |
| C | -0.82323 | 1.34109  | -0.00380 | H | -0.39759 | 3.69464  | -0.06143 |
| C | 0.62296  | 1.63404  | -0.02508 | H | -5.43693 | 1.30129  | 0.03773  |
| C | -2.67524 | -0.25716 | 0.06427  | H | -2.66607 | -2.27865 | -1.82487 |
| C | -3.57839 | 0.82359  | 0.05148  | H | -3.85812 | -3.35365 | -1.02234 |
| C | -3.12743 | 2.13243  | 0.00962  | H | -4.35639 | -1.77208 | -1.68534 |
| C | -1.75553 | 2.40376  | -0.01336 | H | 0.60079  | -3.22510 | 0.02308  |
| O | 1.00054  | 2.81364  | -0.05941 | H | 5.07296  | -2.51060 | 0.02790  |
| O | -0.79417 | -2.26614 | 0.01870  | H | 5.30984  | 1.75122  | -0.89524 |
| O | -1.38994 | 3.68742  | -0.04702 | H | 4.97606  | 3.26239  | -0.01000 |
| O | -4.88943 | 0.50048  | 0.06722  | H | 5.29870  | 1.76153  | 0.89681  |
| C | -3.28006 | -1.64752 | 0.13547  |   |          |          |          |

Structure, energy and Cartesian coordinate of **b-conformer 4**:

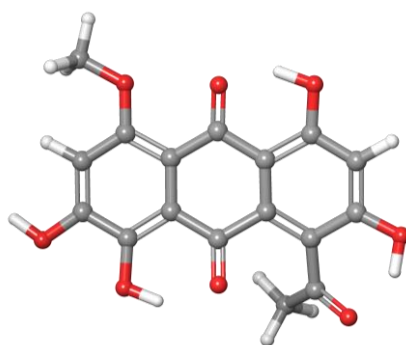

**b-conformer 4** ( $\Delta G = 3.0$  kcal/mol, Boltzmann pop. (298 K) = 0.5%)

---

M06-2X/6-311+G(d,p)-PCM(DMSO)//M06-2X/6-31G(d)-PCM(DMSO):

*Gibbs Free Energy* (a.u.) = -1256.5222624

---

M06-2X/6-311+G(d,p)-PCM(DMSO): *Electronic energy* (a.u.) = -1256.7447054

---

M06-2X/6-31G(d)-PCM(DMSO): *Zero-point correction* (a.u.) = 0.271356

*Thermal correction to Energy* (a.u.) = 0.292266

*Thermal correction to Enthalpy* (a.u.) = 0.293210

*Thermal correction to Gibbs Free Energy* (a.u.) = 0.222443

---

|   |          |          |          |   |          |          |          |
|---|----------|----------|----------|---|----------|----------|----------|
| C | 1.96751  | -1.88359 | -0.24247 | O | -4.32992 | -1.98510 | -0.14824 |
| C | 1.08514  | -0.80447 | -0.19636 | C | -2.60988 | -2.52683 | 1.37713  |
| C | 1.55223  | 0.53450  | -0.04297 | O | 1.61669  | -3.16327 | -0.42124 |
| C | 2.93167  | 0.75242  | 0.10543  | O | 3.37931  | 2.00880  | 0.25711  |
| C | 3.81587  | -0.34592 | 0.09906  | O | 4.14938  | -2.71710 | -0.09989 |
| C | 3.35457  | -1.63313 | -0.07262 | C | 4.77339  | 2.22493  | 0.42810  |
| C | -0.35227 | -1.08641 | -0.31471 | H | 4.88203  | -0.19335 | 0.21775  |
| C | -1.32842 | 0.00825  | -0.06628 | H | -3.89455 | 2.89470  | -0.16470 |
| C | -0.85957 | 1.32574  | -0.09690 | H | -0.46887 | 3.68754  | -0.09663 |
| C | 0.58603  | 1.64246  | -0.08085 | H | -5.10072 | -0.38950 | -0.26673 |
| C | -2.69283 | -0.30299 | 0.00811  | H | -2.44230 | -3.52713 | 0.97351  |
| C | -3.61827 | 0.76880  | -0.09538 | H | -1.67726 | -2.12763 | 1.77192  |
| C | -3.17348 | 2.08682  | -0.11726 | H | -3.33664 | -2.60691 | 2.19154  |
| C | -1.81476 | 2.38088  | -0.08978 | H | 0.64604  | -3.17888 | -0.58125 |
| O | 0.94360  | 2.82755  | -0.08102 | H | 5.07544  | -2.45373 | 0.02177  |
| O | -0.76808 | -2.20162 | -0.63929 | H | 5.14325  | 1.72382  | 1.32802  |
| O | -1.46079 | 3.66589  | -0.09780 | H | 5.33580  | 1.88426  | -0.44673 |
| O | -4.94090 | 0.57220  | -0.14712 | H | 4.88851  | 3.30188  | 0.53769  |
| C | -3.24442 | -1.65376 | 0.32004  |   |          |          |          |

- Calculated NMR chemical shifts for each conformer of **a** and **b**

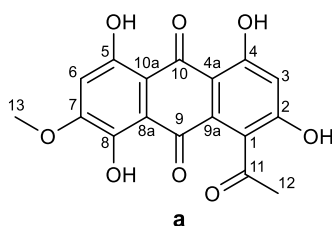

| position | <b>a</b> *                       |                                  | <b>a-conformer 1</b><br>(69%)**  |                                  | <b>a-conformer 2</b><br>(31%)**  |                                  | <b>a-conformer 3</b><br>(0.3%)** |                                  | <b>a-conformer 4</b><br>(0.2%)** |                                  |
|----------|----------------------------------|----------------------------------|----------------------------------|----------------------------------|----------------------------------|----------------------------------|----------------------------------|----------------------------------|----------------------------------|----------------------------------|
|          | $\delta_{\text{C}}(\text{calc})$ | $\delta_{\text{H}}(\text{calc})$ | $\delta_{\text{C}}(\text{calc})$ | $\delta_{\text{H}}(\text{calc})$ | $\delta_{\text{C}}(\text{calc})$ | $\delta_{\text{H}}(\text{calc})$ | $\delta_{\text{C}}(\text{calc})$ | $\delta_{\text{H}}(\text{calc})$ | $\delta_{\text{C}}(\text{calc})$ | $\delta_{\text{H}}(\text{calc})$ |
| 1        | 122.8                            |                                  | 124.9                            |                                  | 118.0                            |                                  | 125.0                            |                                  | 125.1                            |                                  |
| 2        | 156.7                            |                                  | 155.5                            |                                  | 159.4                            |                                  | 156.0                            |                                  | 156.0                            |                                  |
| 3        | 107.5                            | 6.89                             | 107.1                            | 6.85                             | 108.3                            | 7.00                             | 107.1                            | 6.87                             | 107.0                            | 6.87                             |
| 4        | 162.3                            |                                  | 161.9                            |                                  | 163.2                            |                                  | 162.0                            |                                  | 162.0                            |                                  |
| 4a       | 110.2                            |                                  | 109.6                            |                                  | 111.5                            |                                  | 109.4                            |                                  | 109.5                            |                                  |
| 5        | 157.1                            |                                  | 157.0                            |                                  | 157.5                            |                                  | 155.8                            |                                  | 155.8                            |                                  |
| 6        | 106.6                            | 6.93                             | 106.4                            | 6.90                             | 106.7                            | 6.99                             | 117.5                            | 7.19                             | 117.5                            | 7.19                             |
| 7        | 155.4                            |                                  | 155.3                            |                                  | 155.7                            |                                  | 156.1                            |                                  | 156.2                            |                                  |
| 8        | 148.3                            |                                  | 148.3                            |                                  | 148.4                            |                                  | 150.6                            |                                  | 150.5                            |                                  |
| 8a       | 111.9                            |                                  | 111.8                            |                                  | 112.2                            |                                  | 113.4                            |                                  | 113.4                            |                                  |
| 9        | 183.4                            |                                  | 183.0                            |                                  | 184.3                            |                                  | 183.5                            |                                  | 183.5                            |                                  |
| 9a       | 133.8                            |                                  | 132.3                            |                                  | 137.0                            |                                  | 132.1                            |                                  | 132.2                            |                                  |
| 10       | 182.8                            |                                  | 182.8                            |                                  | 182.8                            |                                  | 183.3                            |                                  | 183.2                            |                                  |
| 10a      | 104.3                            |                                  | 104.4                            |                                  | 104.2                            |                                  | 107.8                            |                                  | 107.8                            |                                  |
| 11       | 204.8                            |                                  | 204.0                            |                                  | 206.4                            |                                  | 203.9                            |                                  | 204.0                            |                                  |
| 12       | 33.7                             | 2.58                             | 33.5                             | 2.66                             | 34.3                             | 2.39                             | 33.4                             | 2.66                             | 33.7                             | 2.68                             |
| 13       | 56.6                             | 4.08                             | 56.6                             | 4.07                             | 56.7                             | 4.10                             | 62.9                             | 4.27                             | 62.8                             | 4.26                             |
| 4-OH     |                                  | 12.53                            |                                  | 12.49                            |                                  | 12.61                            |                                  | 12.37                            |                                  | 12.36                            |

\* The Boltzmann weighted chemical shifts

\*\* Boltzmann population

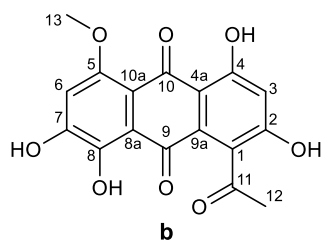

| position | <b>b*</b>                        |                                  | <b>b-conformer 1</b><br>(73%)**  |                                  | <b>b-conformer 2</b><br>(25%)**  |                                  | <b>b-conformer 3</b><br>(1.1%)** |                                  | <b>b-conformer 4</b><br>(0.5%)** |                                  |
|----------|----------------------------------|----------------------------------|----------------------------------|----------------------------------|----------------------------------|----------------------------------|----------------------------------|----------------------------------|----------------------------------|----------------------------------|
|          | $\delta_{\text{C}}(\text{calc})$ | $\delta_{\text{H}}(\text{calc})$ | $\delta_{\text{C}}(\text{calc})$ | $\delta_{\text{H}}(\text{calc})$ | $\delta_{\text{C}}(\text{calc})$ | $\delta_{\text{H}}(\text{calc})$ | $\delta_{\text{C}}(\text{calc})$ | $\delta_{\text{H}}(\text{calc})$ | $\delta_{\text{C}}(\text{calc})$ | $\delta_{\text{H}}(\text{calc})$ |
| 1        | 121.7                            |                                  | 123.6                            |                                  | 116.0                            |                                  | 123.5                            |                                  | 116.0                            |                                  |
| 2        | 155.6                            |                                  | 154.4                            |                                  | 159.1                            |                                  | 154.4                            |                                  | 159.2                            |                                  |
| 3        | 108.1                            | 6.90                             | 107.8                            | 6.86                             | 109.0                            | 7.01                             | 107.5                            | 6.85                             | 108.7                            | 6.99                             |
| 4        | 162.4                            |                                  | 162.0                            |                                  | 163.5                            |                                  | 161.9                            |                                  | 163.5                            |                                  |
| 4a       | 110.9                            |                                  | 110.5                            |                                  | 112.0                            |                                  | 110.5                            |                                  | 111.9                            |                                  |
| 5        | 155.2                            |                                  | 155.2                            |                                  | 155.3                            |                                  | 154.4                            |                                  | 154.5                            |                                  |
| 6        | 104.1                            | 7.27                             | 104.0                            | 7.27                             | 104.4                            | 7.28                             | 104.5                            | 7.00                             | 104.6                            | 7.00                             |
| 7        | 151.3                            |                                  | 151.2                            |                                  | 151.7                            |                                  | 151.0                            |                                  | 151.5                            |                                  |
| 8        | 142.0                            |                                  | 142.2                            |                                  | 141.5                            |                                  | 145.3                            |                                  | 144.5                            |                                  |
| 8a       | 114.7                            |                                  | 114.5                            |                                  | 115.0                            |                                  | 115.0                            |                                  | 115.5                            |                                  |
| 9        | 185.7                            |                                  | 185.3                            |                                  | 186.9                            |                                  | 185.1                            |                                  | 186.7                            |                                  |
| 9a       | 132.1                            |                                  | 130.9                            |                                  | 135.8                            |                                  | 131.3                            |                                  | 136.3                            |                                  |
| 10       | 181.1                            |                                  | 181.1                            |                                  | 181.1                            |                                  | 181.0                            |                                  | 181.0                            |                                  |
| 10a      | 109.2                            |                                  | 109.3                            |                                  | 108.8                            |                                  | 109.7                            |                                  | 109.2                            |                                  |
| 11       | 204.7                            |                                  | 204.2                            |                                  | 205.9                            |                                  | 204.2                            |                                  | 205.9                            |                                  |
| 12       | 33.8                             | 2.58                             | 33.7                             | 2.65                             | 34.0                             | 2.36                             | 33.8                             | 2.65                             | 34.0                             | 2.36                             |
| 13       | 55.9                             | 4.05                             | 55.9                             | 4.05                             | 56.0                             | 4.08                             | 55.7                             | 4.01                             | 55.8                             | 4.04                             |
| 4-OH     |                                  | 13.51                            |                                  | 13.49                            |                                  | 13.57                            |                                  | 13.49                            |                                  | 13.56                            |

\* The Boltzmann weighted chemical shifts

\*\* Boltzmann population
